# Supplementary material for: Potential of 14 C-based versus ∆CO-based ∆ffCO 2 observations to estimate urban fossil fuel CO 2 (ffCO 2 ) emissions
Source: Copernicus journal article supplement (doi:10.5194/egusphere-2023-1239), 2023-07-03
Supplement: Supplementary file [file egusphere-2023-1239-AC3-supplement.pdf]

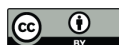

## Potential of $^{14}\text{C}$ -based versus $\Delta\text{CO}$ -based $\Delta\text{ffCO}_2$ observations to estimate urban fossil fuel $\text{CO}_2$ ( $\text{ffCO}_2$ ) emissions

5 Fabian Maier<sup>1</sup>, Christian Rödenbeck<sup>2</sup>, Ingeborg Levin<sup>1</sup>, Christoph Gerbig<sup>2</sup>, Maksym Gachkivskiy<sup>1,3</sup>, and Samuel Hammer<sup>1,3</sup>

<sup>1</sup>Institut für Umweltp Physik, Heidelberg University, INF 229, 69120 Heidelberg, Germany

<sup>2</sup>Department of Biogeochemical Systems, Max Planck Institute for Biogeochemistry, Jena, Germany

<sup>3</sup>ICOS Central Radiocarbon Laboratory, Heidelberg University, Berliner Straße 53, 69120 Heidelberg, Germany

10

*Correspondence to:* Fabian Maier (Fabian.Maier@iup.uni-heidelberg.de)

15 **Abstract.** Atmospheric transport inversions are a powerful tool for independently estimating surface  $\text{CO}_2$  fluxes from atmospheric  $\text{CO}_2$  concentration measurements. However, additional tracers are needed to separate the fossil fuel  $\text{CO}_2$  ( $\text{ffCO}_2$ ) emissions from natural  $\text{CO}_2$  fluxes. In this study we focus on radiocarbon ( $^{14}\text{C}$ ), the most direct tracer for  $\text{ffCO}_2$ , and the continuously measured surrogate tracer carbon monoxide ( $\text{CO}$ ), which is co-emitted with  $\text{ffCO}_2$  during incomplete combustion. In the companion paper by Maier et al. (2023a) we determined for the urban Heidelberg observation site in Southwestern

20 Germany discrete  $^{14}\text{C}$ -based and continuous  $\Delta\text{CO}$ -based estimates of the  $\text{ffCO}_2$  excess concentration ( $\Delta\text{ffCO}_2$ ) compared to a clean-air reference. Here, we use the CarboScope inversion framework adapted for the urban domain around Heidelberg to assess the potential of both types of  $\Delta\text{ffCO}_2$  observations to investigate  $\text{ffCO}_2$  emissions and their seasonal cycle. We find that discrete  $^{14}\text{C}$ -based  $\Delta\text{ffCO}_2$  observations from almost 100 afternoon flask samples collected in the two years 2019 and 2020 are

25 not well suited for estimating robust  $\text{ffCO}_2$  emissions in the main footprint of this urban area with a very heterogeneous distribution of sources including several point sources. The benefit of the continuous  $\Delta\text{CO}$ -based  $\Delta\text{ffCO}_2$  estimates is that they can be averaged to reduce the impact of individual hours with an inadequate model performance. We show that the weekly averaged  $\Delta\text{CO}$ -based  $\Delta\text{ffCO}_2$  observations allow for a robust reconstruction of the seasonal cycle of the area source  $\text{ffCO}_2$  emissions from temporally flat a-priori emissions. In particular, the distinct COVID-19 signal with a steep drop in emissions in spring 2020 is clearly present in these data-driven a-posteriori results. Moreover, our top-down results show a shift in the seasonality of the area source  $\text{ffCO}_2$  emissions around Heidelberg in 2019 compared to the bottom-up estimates from TNO. This highlights the huge potential of  $\Delta\text{CO}$ -based  $\Delta\text{ffCO}_2$  to verify bottom-up  $\text{ffCO}_2$  emissions at urban stations if the  $\Delta\text{CO}/\Delta\text{ffCO}_2$  ratios can be determined without biases.

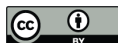

## 1 Introduction

35 The combustion of fossil fuels (ff) like coal, oil and gas is the major reason for the steep increase in the atmospheric CO<sub>2</sub> concentration, which causes current global warming. About 70% of the global ffCO<sub>2</sub> emissions are released from urban hotspot regions (Duren and Miller, 2012). However, the atmospheric CO<sub>2</sub> increase is fortunately strongly weakened, since about half of the human-induced CO<sub>2</sub> emissions are currently taken up by the terrestrial biosphere and the oceans in roughly equal shares (Friedlingstein et al., 2022). Indeed, there are large seasonal and inter-annual variations in the natural CO<sub>2</sub> sinks and sources  
40 that need to be better understood in order to make predictions about future changes in the carbon cycle owing to increased atmospheric CO<sub>2</sub> levels.

The “atmospheric transport inversion” (Newsam and Enting, 1988) is a powerful tool for deducing surface CO<sub>2</sub> fluxes from atmospheric CO<sub>2</sub> observations. Hence, many studies have applied this top-down approach to constrain natural CO<sub>2</sub> fluxes (e.g.,  
45 Rödenbeck et al., 2003; Peylin et al., 2013; Jiang et al., 2016; Rödenbeck et al., 2018; Monteil et al., 2020; Liu et al., 2021). In these calculations, ffCO<sub>2</sub> emissions are typically prescribed using bottom-up information from emission inventories. These bottom-up ffCO<sub>2</sub> emission estimates are typically based on national annual activity data that describe the fuel consumption and sector-specific emission factors (Janssens-Maenhout et al., 2019). While annual national total ffCO<sub>2</sub> emissions are associated with low uncertainties of typically a few percent for developed countries (Andres et al., 2012), their proxy-based  
50 distribution on individual spatial grid cells and individual months, days or hours can dramatically increase the uncertainties (Super et al., 2020). Therefore, it is essential to have an independent verification of the bottom-up statistics, especially on the relevant urban scales where emission reduction measures are implemented. This is essential on the path to net zero emissions. Furthermore, the seasonal cycle of bottom-up ffCO<sub>2</sub> emissions needs to be validated, if they are used in CO<sub>2</sub> inversions to deduce biogenic CO<sub>2</sub> fluxes that are dominated by a large seasonal cycle.

55 Atmospheric transport inversions can be used to validate these bottom-up ffCO<sub>2</sub> emissions (e.g., Levyvaux et al., 2016; Basu et al., 2020). However, their success relies on the ability of the used observational tracers to separate fossil fuel from natural CO<sub>2</sub> contributions (Ciais et al., 2015; Bergamaschi et al., 2018). The most direct tracer for ffCO<sub>2</sub> is radiocarbon (<sup>14</sup>C) in CO<sub>2</sub>. Radiocarbon has a half-life of 5700 years and is therefore no longer present in fossil fuels (Suess, 1955). Thus, the <sup>14</sup>C depletion  
60 in ambient air CO<sub>2</sub> compared to a clean-air reference site can directly be used to estimate the recently added ffCO<sub>2</sub> excess (ΔffCO<sub>2</sub>) at the observation site (Levin et al., 2003; Turnbull et al., 2006). These ΔffCO<sub>2</sub> estimates can then be implemented in regional inversions to evaluate bottom-up ffCO<sub>2</sub> emissions in the footprints of the observation sites (Graven et al., 2018; Wang et al., 2018). However, a drawback of <sup>14</sup>C-based ΔffCO<sub>2</sub> estimates is that they have poor temporal and spatial coverage due to the labor-intensive and expensive <sup>14</sup>C sampling and analysis. Therefore, continuously measured atmospheric excess  
65 concentrations of trace gases like CO, which is co-emitted with ffCO<sub>2</sub>, have been used as alternative proxies for ΔffCO<sub>2</sub> (e.g., Gamnitzer et al., 2006; Turnbull et al., 2006; Levin and Karstens, 2007; van der Laan et al., 2010; Vogel et al., 2010). However,



to construct a high-resolution  $\Delta\text{CO}$ -based  $\Delta\text{ffCO}_2$  record requires to correctly determine the  $\Delta\text{CO}/\Delta\text{ffCO}_2$  ratio in the footprint of the observation site. This can indeed be a big challenge: As the  $\text{CO}/\text{ffCO}_2$  emission ratio depends on the combustion efficiency and applied end-of-pipe measures, it is very variable for different emission processes and changes with time due to technological progress (Dellaert et al., 2019).

In the companion paper by Maier et al. (2023a) we calculated a  $\Delta\text{CO}$ -based  $\Delta\text{ffCO}_2$  record for the urban Heidelberg observation site from the  $\Delta\text{CO}/\Delta\text{ffCO}_2$  ratios of almost 350  $^{14}\text{C}$  flask samples collected between 2019 and 2020. By comparing the  $\Delta\text{CO}$ -based  $\Delta\text{ffCO}_2$  with the  $^{14}\text{C}$ -based  $\Delta\text{ffCO}_2$  from the flasks we estimated for the hourly  $\Delta\text{CO}$ -based  $\Delta\text{ffCO}_2$  record an uncertainty of about 4 ppm, which is almost 4 times larger than typical  $^{14}\text{C}$ -based  $\Delta\text{ffCO}_2$  uncertainties. About half of this uncertainty could be attributed to the spatiotemporal variability of the  $\Delta\text{CO}/\Delta\text{ffCO}_2$  ratios.

The goal of this study is to investigate which type of  $\Delta\text{ffCO}_2$  observations provides the greater benefit in an atmospheric transport inversion to verify bottom-up  $\text{ffCO}_2$  emission estimates in an urban region: (1) sparse  $^{14}\text{C}$ -based  $\Delta\text{ffCO}_2$  observations from flasks with a small uncertainty or (2)  $\Delta\text{CO}$ -based  $\Delta\text{ffCO}_2$  estimates at high temporal resolution but with an increased uncertainty? For this, we adapt the CarboScope inversion framework (Rödenbeck, 2005) for the highly populated and industrialized Rhine Valley in Southwestern Germany around the Heidelberg observation site. We perform separate inversion runs with the  $^{14}\text{C}$ - and  $\Delta\text{CO}$ -based  $\Delta\text{ffCO}_2$  observations from Heidelberg. Thereby, we mainly focus on the seasonal cycle in the  $\text{ffCO}_2$  emissions and investigate which  $\Delta\text{ffCO}_2$  information is best suited to verify the seasonal cycle of the bottom-up emissions in the main footprint of Heidelberg.

## 2 Methods

### 2.1 Heidelberg observation site

Heidelberg is a medium-sized city with about 160'000 inhabitants, which is part of the Rhine-Neckar metropolitan area with over 2 million people. The Heidelberg observation site is located on the university campus in the northern part of the city. The sampling inlet line is 30 m above ground on the roof of the institute's building. Local  $\text{ffCO}_2$  emissions originate mainly from traffic and residential heating but there is also a nearby combined heat and power station as well as a large coal-fired power plant and the giant industrial complex from BASF at 15-20 km to the North-West. Due to its location in the Upper Rhine Valley, Heidelberg is frequently influenced by south-westerly air masses, which carry the signals from heterogeneous sources in the Rhine Valley. A more detailed description of the Heidelberg observation site can be found in Levin et al. (2011). The  $^{14}\text{C}$ -based and  $\Delta\text{CO}$ -based  $\Delta\text{ffCO}_2$  observations from Heidelberg are presented in Sect. 2.2.3.



## 2.2 Inversion setup

The CarboScope inversion algorithm was initially introduced by Rödenbeck et al. (2003) to estimate inter-annual and spatial variability in global CO<sub>2</sub> surface-atmosphere fluxes. The algorithm can also be applied to regional inversions (Rödenbeck et al., 2009). In the present study we adapt this inversion modelling framework to estimate ffCO<sub>2</sub> surface fluxes in the regional Rhine Valley domain (see Fig. 1) with ΔffCO<sub>2</sub> observations from the Heidelberg observation site (see Fig. 2). This requires a high-resolution atmospheric transport model and a careful estimation of the lateral ΔffCO<sub>2</sub> boundary conditions.

The CarboScope inversion system uses Bayesian inference to minimize the deviations between observed and modelled ΔffCO<sub>2</sub> concentrations by finding the (global) minimum of the cost function (for technical details see Rödenbeck, 2005). This cost function consists of a data constraint and an a-priori constraint, which is needed to regularize the underdetermined problem and to prevent large and unrealistic spatiotemporal ffCO<sub>2</sub> flux variabilities (Rödenbeck et al., 2018). The data constraint is weighted by the uncertainties of the transport model and the ΔffCO<sub>2</sub> observations. Furthermore, the uncertainty applied for the a-priori ffCO<sub>2</sub> emissions determines the impact of the a-priori constraint. Overall, the ratio between the model-data uncertainty and the a-priori flux uncertainty controls the strength of the a-priori constraint over the observational constraint (Rödenbeck, 2005; Kountouris et al., 2018; Munassar et al., 2022).

### 2.2.1 Atmospheric transport model

We use the Stochastic Time-Inverted Lagrangian Transport (STILT; Lin et al., 2003; Nehrkorn et al., 2010) model, driven by meteorological fields from the high-resolution Weather Research and Forecasting (WRF) model, to simulate the atmospheric transport in the Rhine Valley domain (see rectangular in Fig. 1). The WRF meteorological fields have a horizontal resolution of 2 km and are based on hourly 0.25°-resolved European ReAnalysis 5 (ERA5, Hersbach et al., 2020) data from the European Centre for Medium-Range Weather Forecasts (ECMWF). As there are many point source emissions within the Rhine Valley, we apply the STILT volume source influence (VSI) approach introduced by Maier et al. (2022) to model them. This model approach takes into account the effective heights of the point source emissions, which are typically released from elevated chimney stacks. For the area source emissions, we apply the standard approach in STILT, which assumes that all emissions are released from the surface.

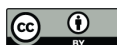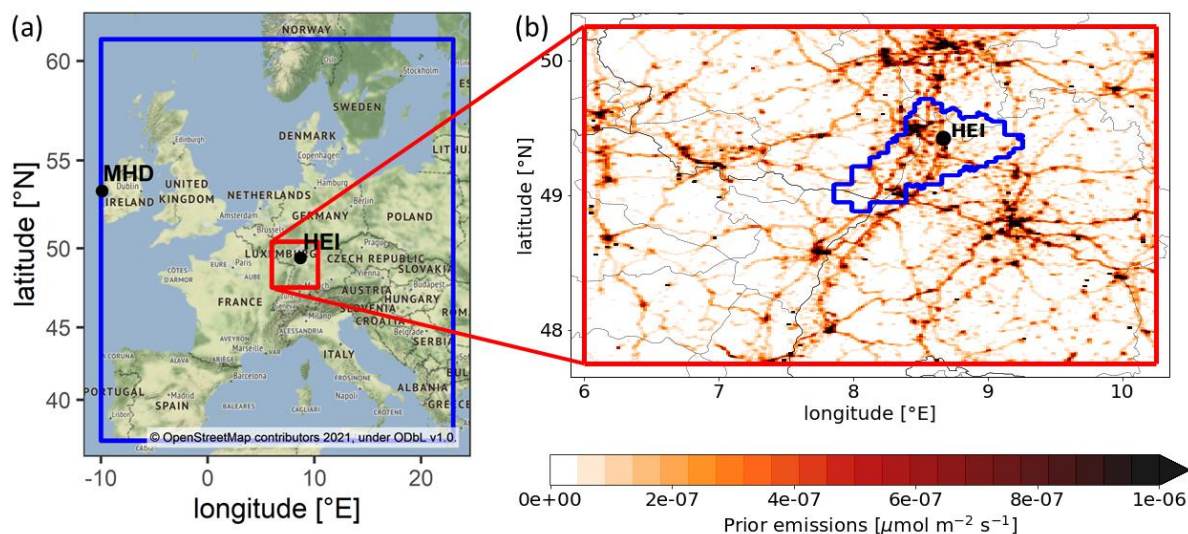

**Figure 1:** (a) Map with the Central European STILT domain (blue) and the high-resolution Rhine Valley STILT domain (red). The observation site Heidelberg (HEI) and the marine background site Mace Head (MHD) are indicated. (b) Zoom into the Rhine Valley domain with the mean prior ffCO<sub>2</sub> emissions from the TNO inventory for 2019-2020. The blue surrounded region in the zoom shows the "50%-footprint" range, i.e., the area accounting for 50% of the Heidelberg average footprint within the Rhine Valley.

### 2.2.2 A-priori information

We use the ffCO<sub>2</sub> emissions from TNO (Dellaert et al., 2019; Denier van der Gon et al., 2019) with a horizontal resolution of about 1 km (1/60° lon, 1/120° lat) as a-priori estimates for our Rhine Valley inversion. The TNO emission inventory provides annual total ffCO<sub>2</sub> emissions for 15 different source sectors as well as sector-specific temporal profiles. In this study, we treat the ffCO<sub>2</sub> emissions from the point source dominated "energy production" and "industry" TNO sectors separately due to the following reasons: (1) While the VSI approach (see above) strongly improves the vertical representation of point source emissions in STILT, it still remains difficult to correctly describe the mixing and transport of narrow point source plumes with meteorological fields that have a resolution of 2 km. (2) Due to the elevated release of point source emissions from high stacks, the Heidelberg observation site with an air intake height of only 30m above ground is rarely influenced by distinct emission plumes from nearby point sources (see Maier et al., 2023a). This makes it difficult to evaluate those point source emissions with ΔffCO<sub>2</sub> observations from the Heidelberg observation site alone. (3) We expect that the energy and industry emissions in the Rhine Valley are better known in TNO than the more diffuse area source emissions. We thus focus on how well our observations are able to constrain area source emissions in the footprint of the Heidelberg site.

For these reasons, we prescribe the energy and industry emissions in our inversion setup and adjust only the area source emissions in the Rhine Valley, which mainly originate from the heating and traffic sector. We use the sector-specific monthly profiles provided by TNO to calculate from the annual total emissions monthly ffCO<sub>2</sub> emissions for the energy and industry sectors and treat them as fixed fluxes in our inversion system. As we aim to investigate the information of the ΔffCO<sub>2</sub>

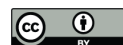

145 observations regarding the seasonal cycle of the area source  $\text{ffCO}_2$  emissions, we apply temporally constant (“flat”) a-priori  $\text{ffCO}_2$  emissions for the area sources. For this, we use the (spatially highly resolved) 2-year average TNO area source emissions of the years 2019 and 2020.

### 2.2.3 Observations

In separate inversion runs, we use either the discrete  $^{14}\text{C}$ -based  $\Delta\text{ffCO}_2$  estimates from flasks, collected as integrals over one hour, or the hourly  $\Delta\text{CO}$ -based  $\Delta\text{ffCO}_2$  record from the Heidelberg observation site (see Fig. 2). The companion paper (Maier et al., 2023a) describes in detail the construction of this continuous  $\Delta\text{CO}$ -based  $\Delta\text{ffCO}_2$  record and gives an estimation of its uncertainty. In short, the  $\Delta\text{CO}$ -based  $\Delta\text{ffCO}_2$  record has been constructed by dividing the observed hourly  $\Delta\text{CO}$  offsets compared to the marine reference site Mace Head (MHD) by an average  $\Delta\text{CO}/\Delta\text{ffCO}_2$  ratio, which was determined by the  $\Delta\text{CO}$  and  $^{14}\text{C}$ -based  $\Delta\text{ffCO}_2$  observations of almost 350 day- and night-time flask samples collected in 2019 and 2020. In the inversion, however, we only use the afternoon  $^{14}\text{C}$ -based and  $\Delta\text{CO}$ -based  $\Delta\text{ffCO}_2$  observations between 11 and 16 UTC, as 155 night-time situations are associated with a poorer transport model performance. Note that the hourly-integrated  $\Delta\text{ffCO}_2$  observation e.g. at 11 UTC corresponds to the time period between 11 and 12 UTC.

Furthermore, we apply a  $2\sigma$ -selection criterion to the  $\Delta\text{ffCO}_2$  observations as introduced by Rödenbeck et al. (2018). For this, we take the high-resolution annual total  $\text{ffCO}_2$  emissions from TNO and apply the hourly sector-specific temporal profiles. 160 These hourly resolved  $\text{ffCO}_2$  emissions are then transported with the WRF-STILT model to simulate hourly  $\Delta\text{ffCO}_2$  concentrations. The mean difference between the simulated and the  $\Delta\text{CO}$ -based  $\Delta\text{ffCO}_2$  observations is only  $-0.04\text{ppm}$  during afternoon hours with a standard deviation of  $6.76\text{ppm}$ , which indicates that the model is able to reproduce, on average, the afternoon  $\Delta\text{CO}$ -based  $\Delta\text{ffCO}_2$  observations without a significant mean bias. This directly allows the application of the  $2\sigma$ -selection criterion, which means that we only use those  $\Delta\text{ffCO}_2$  observations, whose deviation to the modelled  $\Delta\text{ffCO}_2$  is 165 smaller than 2 times the standard deviation between observed and modelled  $\Delta\text{ffCO}_2$ , i.e. which is within the  $2\sigma$ -range. Therewith, we exclude the data outside the  $2\sigma$ -range, which obviously cannot be represented with our transport model. Examples of such data are observations during very strong air stagnation events in winter, which are often underestimated in the model, or vice versa, situations when the model overestimates the point source influence at the observation site. Since the inversion system assumes a Gaussian distribution for the model-data mismatch, these extreme outlier events would have a strong impact on the inversion results (Rödenbeck et al., 2018). Thus, this  $2\sigma$ -selection can be seen as an additional regularization for the inversion to avoid using situations with unrealistic model simulations. We apply the  $2\sigma$ -selection criterion to both the  $^{14}\text{C}$ -based  $\Delta\text{ffCO}_2$  observations from the afternoon flask samples and the afternoon hours of the  $\Delta\text{CO}$ -based  $\Delta\text{ffCO}_2$  record. 170

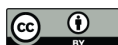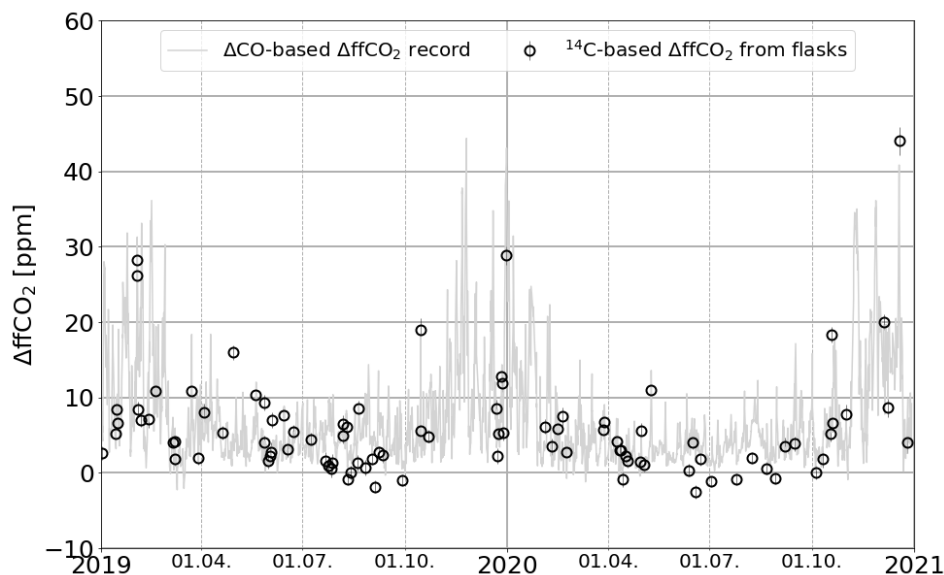

175 **Figure 2: Afternoon  $\Delta\text{ffCO}_2$  observations from the Heidelberg observation site. The grey curve indicates the  $\Delta\text{CO}$ -based  $\Delta\text{ffCO}_2$  record and the black circles the  $^{14}\text{C}$ -based  $\Delta\text{ffCO}_2$  estimates from flasks. Both, the  $^{14}\text{C}$ -based and  $\Delta\text{CO}$ -based  $\Delta\text{ffCO}_2$  observations are  $2\sigma$ -selected.**

#### 2.2.4 Lateral boundary conditions

We set up the inversion system for the Rhine Valley domain ( $6.00^\circ\text{E} - 10.25^\circ\text{E}$ ,  $47.75^\circ\text{N} - 50.25^\circ\text{N}$ , red rectangular in Fig. 1a) around the Heidelberg observation site and run the inversion for the full two years 2019 and 2020 within this domain. As we calculated the  $^{14}\text{C}$ - and  $\Delta\text{CO}$ -based  $\Delta\text{ffCO}_2$  excess compared to MHD (see Maier et al., 2023a), however, we need to define a suitable  $\Delta\text{ffCO}_2$  background representative for the boundary of the Rhine Valley domain. In the following, we call this the “Rhine Valley  $\Delta\text{ffCO}_2$  background”. By definition, we assume that the  $\Delta^{14}\text{CO}_2$  observations from MHD correspond to  $\Delta\text{ffCO}_2 = 0$  ppm, which might be reasonable since the MHD  $^{14}\text{CO}_2$  samples were only collected during situations with clean westerly air masses from the Atlantic. Therefore, it seems to be suitable to apply the MHD ( $\Delta\text{ffCO}_2 = 0$  ppm) background to the entire western boundary of the Central European STILT domain (blue rectangular in Fig. 1a). But how representative is this background for the other boundaries of the Central European domain? Maier et al. (2023b) estimated the representativeness bias of the MHD background for the probably most polluted eastern boundary of the Central European domain. They could show that the representativeness bias is on average smaller than 0.1 ppm for an observation site in Central Europe. Therefore, we neglect this bias and assume  $\Delta\text{ffCO}_2 = 0$  ppm also at the non-western boundaries of the Central European domain. To estimate the Rhine Valley  $\Delta\text{ffCO}_2$  background we use a nested STILT model approach with a high (2 km) resolution WRF meteorology in the Rhine Valley domain and a coarser (10 km) WRF resolution in the Central European STILT domain outside the Rhine Valley. We use for both domains hourly  $\text{ffCO}_2$  emissions from TNO (Dellaert et al., 2019; Denier van der Gon et al., 2019). This nested approach allows us to separate the  $\text{ffCO}_2$  contributions from each STILT domain. With this setup we model for the Heidelberg site for each hour during 2019 and 2020 the  $\Delta\text{ffCO}_2$  contributions from the Central European domain



outside the Rhine Valley ( $\Delta\text{ffCO}_{2,\text{CE-RV}}$ ), which we use as the Rhine Valley background. We then subtract this modelled Rhine Valley  $\Delta\text{ffCO}_2$  background ( $\Delta\text{ffCO}_{2,\text{CE-RV}}$ ) from the estimated  $\Delta\text{ffCO}_2$  excess compared to MHD ( $\Delta\text{ffCO}_{2,\text{MHD}}$ ), to obtain the  $\Delta\text{ffCO}_2$  excess compared to the Rhine Valley boundary ( $\Delta\text{ffCO}_{2,\text{RV}}$ ):

$$\Delta\text{ffCO}_{2,\text{RV}} = \Delta\text{ffCO}_{2,\text{MHD}} - \Delta\text{ffCO}_{2,\text{CE-RV}} \quad (1)$$

200 The  $\Delta\text{ffCO}_{2,\text{RV}}$  excess concentrations compared to the Rhine Valley boundary are then introduced into the inversion system to constrain the  $\text{ffCO}_2$  emissions within the Rhine Valley.

### 2.2.5 Model-data mismatch

The model-data mismatch is calculated by subtracting the modelled from the observed  $\Delta\text{ffCO}_{2,\text{RV}}$  concentrations. The uncertainties of the  $\Delta\text{CO}$ -based and  $^{14}\text{C}$ -based  $\Delta\text{ffCO}_2$  observations are estimated to be 3.9 ppm and 1.1 ppm, respectively (see  
205 Maier et al., 2023a). The transport model uncertainty of urban, continental sites like Heidelberg with complex local circulations was assumed to be 5ppm. The quadratically added observational and transport model uncertainties yield the total uncertainty of the model-data mismatch. To account for the temporal correlations of observations that are close together in time, we apply a data density weighting as described in Rödenbeck (2005). It artificially increases the uncertainty of the model-data mismatch,  
210 that all observations within one week lead to the same constraint as a single observation per week. The weighting interval was set to one week because this is a typical duration of synoptic weather patterns.

### 2.2.6 Degrees of freedom

Since we only use  $\Delta\text{ffCO}_2$  observations from a single station in the Rhine Valley, we restrict the number of degrees of freedom in our inversion system so that the inverse problem is not too strongly underdetermined. Therefore, we only investigate the area source emissions in the Rhine Valley and prescribe the energy and industry emissions, as mentioned above. Moreover,  
215 the inversion system adjusts only one spatial scaling factor, which increases or decreases the area source emissions in the whole Rhine Valley domain equally. Hence, we expect that the high-resolution TNO inventory is much better at describing the large spatial heterogeneity in the  $\text{ffCO}_2$  emissions within the Rhine Valley than our top-down approach. As we want to investigate the seasonal cycle of the  $\text{ffCO}_2$  emissions, additional temporal degrees of freedom are needed. For this, we choose a temporal correlation length of about 4 months (“Filt3T” in CarboScope notation), which should be appropriate to explore  
220 seasonal cycles. Finally, since the Heidelberg observations cannot be used to constrain the emissions in the whole Rhine-Valley domain, we only analyze the a-posteriori area source emissions in the (most constrained) nearfield of the observation site. We define the nearfield of Heidelberg as the area which accounts for 50% of the temporally accumulated footprint in the Rhine Valley domain for the two years 2019 and 2020 (blue surrounded region in Fig. 1b).





### 3 Results

#### 225 3.1 Potential of flask-based $\Delta\text{ffCO}_2$ estimates to investigate the seasonal cycle in $\text{ffCO}_2$ emissions

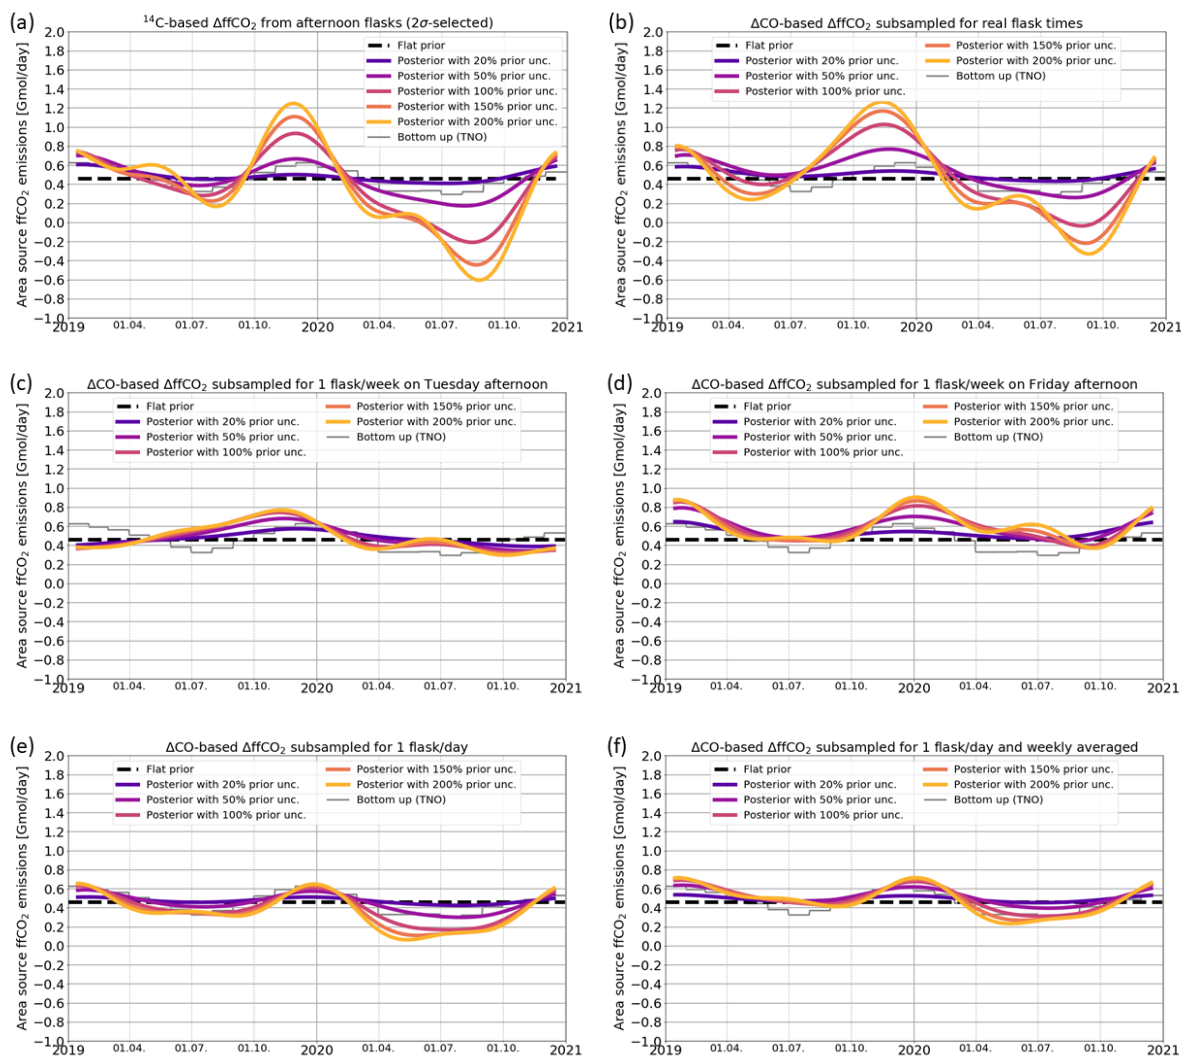

230 **Figure 3:** Area source  $\text{ffCO}_2$  emissions in the nearfield (blue surrounded area in Fig. 1b) of Heidelberg. Shown are the flat prior emissions (black dashed line), the a-posteriori emissions for different prior uncertainties between 20% and 200% of the flat a-priori emissions (colored solid lines) as well as the bottom-up estimates from TNO (grey line). In panel (a)  $^{14}\text{C}$ -based  $\Delta\text{ffCO}_2$  estimates from 94  $2\sigma$ -selected afternoon flasks from Heidelberg were used as observational input (cf. Fig. 2). Panel (b) shows the inversion results if the  $\Delta\text{CO}$ -based  $\Delta\text{ffCO}_2$  observations subsampled during the 94 flask sampling hours were used. In the panels (c) and (d) the inversion was constrained with one hourly afternoon (at 13 UTC)  $\Delta\text{CO}$ -based  $\Delta\text{ffCO}_2$  observation every week collected on **Tuesday (c) or Friday (d)**. Panel (e) shows the results if each day at 13 UTC one hypothetical flask is collected. In panel (f), the 7 afternoon flask observations within one week are averaged.

First, we investigate the potential of flask-based  $\Delta\text{ffCO}_2$  estimates to explore the seasonal cycle of the area source  $\text{ffCO}_2$  emissions around the urban Heidelberg observation site. For this we use the average of the TNO area source  $\text{ffCO}_2$  emissions

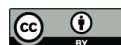

of the two years 2019 and 2020 as a temporally constant prior estimate (see Sect. 2.2.2). To analyze the impact of the  
240 observational constraint on the a-posteriori results, we apply different prior uncertainties, which effectively lead to different  
ratios between a-priori and data constraint (see Fig. 3). In a first inversion run (Fig. 3a), we use the  $^{14}\text{C}$ -based  $\Delta\text{ffCO}_2$   
observations from the 94 afternoon flasks collected in the two years 2019 and 2020 in Heidelberg. The distribution of the flask  
samplings over the two years can be seen in Fig. 2. Due to various reasons (e.g. testing of the flask sampler associated with  
frequent changes of the flask sampling strategy) the flasks were not evenly collected and especially the winter 2019/2020 has  
245 only thin flask coverage. The  $^{14}\text{C}$ -based a-posteriori  $\text{ffCO}_2$  emissions show a clear seasonal cycle for the larger prior  
uncertainties, which is fully data-driven. However, large and unrealistic a-posteriori flux variabilities emerge for prior  
uncertainties larger than 50% of the flat a-priori emissions. For example, the low flask coverage during the winter period  
2019/2020 leads to a huge maximum in the area source  $\text{ffCO}_2$  emissions in November 2019 when the inversion algorithm tries  
to minimize the model-data mismatches of individual flasks. Similarly, the flask samples with vanishing or even negative  
250  $\Delta\text{ffCO}_2$  estimates in summer 2020 (cf. Fig. 2) cause a strong reduction of the a-posteriori emissions. Therefore, this urban  
inversion setup obviously needs a very strong regularization through low prior uncertainties to prevent the fitting of individual  
flask observations.

We further investigate whether these overfitting patterns can be attributed to the uneven distribution of the flask samples. For  
255 this, we subsample the continuous  $\Delta\text{CO}$ -based  $\Delta\text{ffCO}_2$  record. In a first step, we use the  $\Delta\text{CO}$ -based  $\Delta\text{ffCO}_2$  observations from  
those 94 afternoon hours with flask samplings as observational constraint (Fig. 3b). For the most part, the subsampled  $\Delta\text{CO}$ -  
based  $\Delta\text{ffCO}_2$  observations reproduce the a-posteriori results of the  $^{14}\text{C}$ -based  $\Delta\text{ffCO}_2$  estimates. However, there are differences  
like the shifted summer minimum in 2019. These differences can be explained by the variability of the  $\Delta\text{CO}/\Delta\text{ffCO}_2$  ratios that  
we fully neglected by using a constant mean ratio for constructing the  $\Delta\text{CO}$ -based  $\Delta\text{ffCO}_2$  record. Thus, when comparing the  
260 results with the TNO seasonality of emissions (grey histogram) it seems obvious that the  $^{14}\text{C}$ -based  $\Delta\text{ffCO}_2$  estimates provide  
the more accurate data than the subsampled  $\Delta\text{CO}$ -based  $\Delta\text{ffCO}_2$  record. However, the general similarity between both results  
means that we can use the continuous  $\Delta\text{CO}$ -based  $\Delta\text{ffCO}_2$  record to investigate an even data coverage with hypothetical flask  
samples collected in Heidelberg. The middle panels in Fig. 3 show the inversion results if the  $\Delta\text{CO}$ -based  $\Delta\text{ffCO}_2$  record is  
subsampled for one flask every week on Tuesday (c) or on Friday afternoon (d), respectively. The increased number of evenly  
265 distributed weekly flasks strongly dampens the variability of the a-posteriori results. However, they show large differences  
depending on which day of the week the hypothetical afternoon flask was collected. Whereas the Tuesday flasks for example  
lead to a quite unrealistic gradual increase in the  $\text{ffCO}_2$  emissions between January and November 2019, the Friday flasks  
show a more realistic seasonal cycle in this year. In contrast, both Tuesday and Friday flasks lead to an unexpected maximum  
in summer 2020. This implies that the a-posteriori results are still dependent on the selection of the individual hypothetical  
270 flasks. Therefore, it seems that even a uniform data coverage with a realistic flask sampling frequency of one flask per week  
is not sufficient to determine a plausible seasonal cycle of the area source  $\text{ffCO}_2$  emissions around Heidelberg, as suggested  
by the TNO inventory. However, the situation should be better in the case of real, hourly-integrated  $^{14}\text{C}$  flasks that are collected



e.g. once per week, as the average  $\Delta\text{CO}/\Delta\text{ffCO}_2$  ratio used to construct the  $\Delta\text{CO}$ -based  $\Delta\text{ffCO}_2$  record might be inappropriate for individual hours.

275

Finally, we investigated the benefit of an extremely high flask sampling frequency with one flask per afternoon (see Fig. 3e). Here, the a-posteriori results seem to approach towards the TNO bottom-up emissions in 2019. However, there are still unexpectedly strong deviations between the top-down and bottom-up estimates in the summer half-year 2020 for increased prior uncertainties. These differences might be caused by individual afternoon hours with a negative model-data mismatch in summer 2020. To reduce the impact of such hours, we perform a separate inversion run where we average the modelled and observational data of all 7 hypothetical afternoon flasks within each week (Fig. 3f). This further reduces the spread of a-posteriori results, particularly in summer 2020, further approaching towards the seasonal amplitude of the bottom-up TNO emissions. Thus, several afternoon flasks per week would be needed so that the influence of individual flasks on the inversion results can be averaged out and a plausible seasonal cycle amplitude in the area source  $\text{ffCO}_2$  emissions around Heidelberg can be obtained.

285

Overall, these results show that the a-posteriori estimates are very sensitive to individual flask observations in this target region with very heterogeneously distributed  $\text{ffCO}_2$  sources. Obviously, the transport model fails to appropriately simulate the  $\Delta\text{ffCO}_2$  concentrations for individual afternoon hours. This can be explained by remaining shortcomings in the transport model but also by the enormous heterogeneity of the  $\text{ffCO}_2$  emissions in the footprint of the Heidelberg observation site. As already mentioned in Sect. 2, modelling individual plumes from point source emissions is a particular challenge in this urban region, and e.g. the forward model estimates of point source signals, even with the improved VSI approach seem often incorrect, at least at a temporal resolution of one hour. Therefore, we decided to aggregate our observations over multiple hours, and change the observation operator in the model such that only aggregated model results are compared to aggregated observations. This minimizes the impact of individual hours with poor model performance.

295

### 3.2 Potential of continuous $\Delta\text{CO}$ -based $\Delta\text{ffCO}_2$ estimates to investigate the seasonal cycle in $\text{ffCO}_2$ emissions

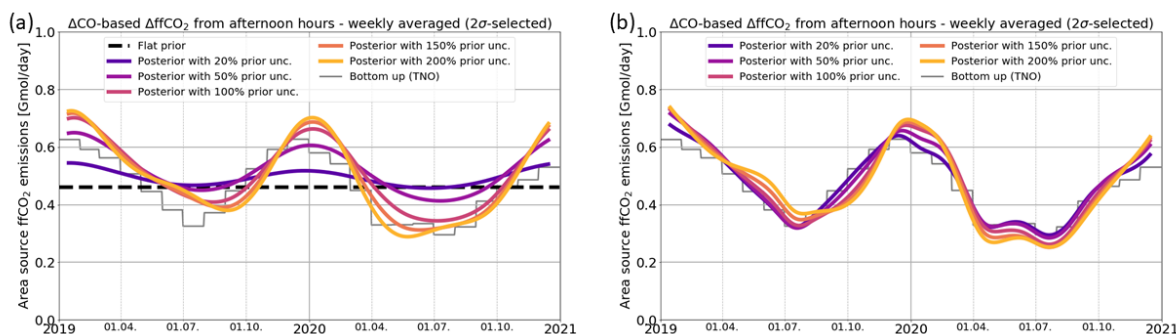



300 **Figure 4: Area source ffCO<sub>2</sub> emissions in the nearfield (blue surrounded area in Fig. 1b) of Heidelberg. In (a) a flat prior (black dashed line) was used for the area source emissions and in (b) the monthly bottom-up estimates from TNO (grey line) were used as a-priori estimate. Shown are the a-posteriori emissions for different prior uncertainties between 20 and 200% (colored solid lines). The inversion was constrained with weekly averages of hourly, 2 $\sigma$ -selected afternoon  $\Delta$ CO-based  $\Delta$ ffCO<sub>2</sub> observations from Heidelberg.**

The big advantage of the continuous  $\Delta$ CO-based  $\Delta$ ffCO<sub>2</sub> record is that it provides a full temporal coverage of the inversion period and can, thus, also be averaged such that the sensitivity of the a-posteriori results on individual (hourly) model-data mismatches is strongly reduced. In Appendix A1, we investigate if the averaging over the five (11 – 16 UTC) afternoon hours of the  $\Delta$ CO-based  $\Delta$ ffCO<sub>2</sub> record is enough to sufficiently reduce the impact of the point source emissions on the a-posteriori area source emissions (see magenta curves in Fig. A1). For this, we perform in addition to the standard inversion runs with fixed point source emissions further sensitivity runs with adjustable point source emissions. Ideally, the a-posteriori area source emissions are identical for both inversion runs, meaning that the modelling of the well-known point source emissions has no impact on the area source emissions. However, depending on whether the point source emissions are being adjusted in the inversion framework or not, the a-posteriori area source ffCO<sub>2</sub> emissions can differ by more than 100% for individual seasons. Thus, an averaging interval of one afternoon only seems to be too short.

The averaging interval of one week strongly reduces the impact of the point sources on the a-posteriori area source emissions (see blue curves in Fig. A1). It limits the differences between the a-posteriori area source emissions of the inversion runs with fixed and adjustable point source emissions to below 30% for individual seasons. Averaged over the two years 2019 and 2020, these differences are below 10%. We also tested an extreme averaging interval of one month, which further reduces the difference between the respective a-posteriori area source emissions to below 20% for individual seasons (see pink curves in Fig. A1). However, such a long interval would lead to an averaging of very different meteorological situations, which reduces the temporal information of the observations. Therefore, we decided to apply in the following an averaging interval of one week, which is the typical length scale of synoptic weather patterns. The difference between the a-posteriori area source emissions of the inversion runs with fixed and adjustable point source emissions can be seen as an uncertainty estimate for the area source emissions due to imperfect point source modelling.

325 In the following, we use the weekly averaged afternoon  $\Delta$ CO-based  $\Delta$ ffCO<sub>2</sub> observations to investigate the seasonal cycle of the area source ffCO<sub>2</sub> emissions around Heidelberg (see Fig. 4a). If the prior uncertainty is chosen large enough, the seasonal cycle amplitude of the a-posteriori estimates agrees with that of the TNO inventory reasonably well. Moreover, the data-driven inversion results distinctly show the effect of the COVID-19 restrictions with lower emissions in 2020 compared to 2019. In Southwestern Germany, the first COVID-19 lockdown started in mid-March 2020. Indeed, the inversion results show at that time a strong decrease in the area source ffCO<sub>2</sub> emissions. In particular, the decline in the a-posteriori ffCO<sub>2</sub> emissions is much deeper in spring 2020 compared to spring 2019 and the minimum of the seasonal cycle is flatter in 2020 as it extends over several summer months.



The agreement with the phasing of the seasonal cycle of the TNO inventory seems to be better in 2020 than in 2019. In 2020, TNO provides country-specific “COVID-19” seasonal cycles, which take into account the timing and the strength of the respective national restrictions. In Fig. 4 an average over the German and French seasonal cycle is shown, which seems to be confirmed by our observations. The shown TNO seasonal cycle for 2019 is a general European average estimate that is not specific for 2019. It assumes minimum emissions in July, whereas our observations show minimal emissions in August and September. Indeed, this shifted minimum of the seasonal cycle coincides with the summer holidays in Southwestern Germany, which are from August to mid-September.

We want to further investigate the consistency of the seasonal cycles from the bottom-up and the top-down estimates. For this, we explore the effect of using the monthly TNO bottom-up seasonal cycle for the a-priori emissions (see Fig. 4b). As expected, the phase of the a-posteriori seasonal cycle is in agreement with the TNO inventory in 2020. However, in 2019 the a-priori information pulls the summer emission minimum to July. With weakening regularization of the prior the inversion algorithm tries to shift the minimum of the a-posteriori seasonal cycle from July towards August and September. Due to the limited temporal degrees of freedom of the inversion this shifting results in artificially increasing the emissions in May 2019 and lowering them in October. Hence, these results point to some inconsistencies in the seasonality of the TNO emissions in the urban footprint of the Heidelberg observation site. In fact, a correct phasing of the fossil emissions is essential when prescribed ffCO<sub>2</sub> emissions are used in CO<sub>2</sub> model inversions to separate the fossil from the biogenic contribution in atmospheric CO<sub>2</sub> observations to constrain CO<sub>2</sub> fluxes from the biosphere. Although these biospheric CO<sub>2</sub> signals are typically estimated with observations from sites that are more remote and rural than the urban Heidelberg site, a correct seasonality in the prescribed ffCO<sub>2</sub> emissions still seems to be important when deducing the month-to-month variations in the biospheric CO<sub>2</sub> fluxes.

Overall, the (weekly averaged)  $\Delta\text{CO}$ -based  $\Delta\text{ffCO}_2$  record seems to be well suited to estimate (and verify) the seasonal cycle of bottom-up ffCO<sub>2</sub> emissions in the nearfield of the Heidelberg observation site. This is a very promising result, especially considering how simple the  $\Delta\text{CO}$ -based  $\Delta\text{ffCO}_2$  record was constructed. It is based on the average  $\Delta\text{CO}/\Delta\text{ffCO}_2$  ratio estimated from <sup>14</sup>C measurements on flask samples where a potential seasonal cycle in the  $\Delta\text{CO}/\Delta\text{ffCO}_2$  ratios was fully neglected. In the following we investigate, among other possible error influences, the effect of a hypothetical seasonal cycle in the  $\Delta\text{CO}/\Delta\text{ffCO}_2$  ratios on the inversion results.



### 3.3 Robustness of the $\Delta\text{CO}$ -based $\Delta\text{ffCO}_2$ inversion results

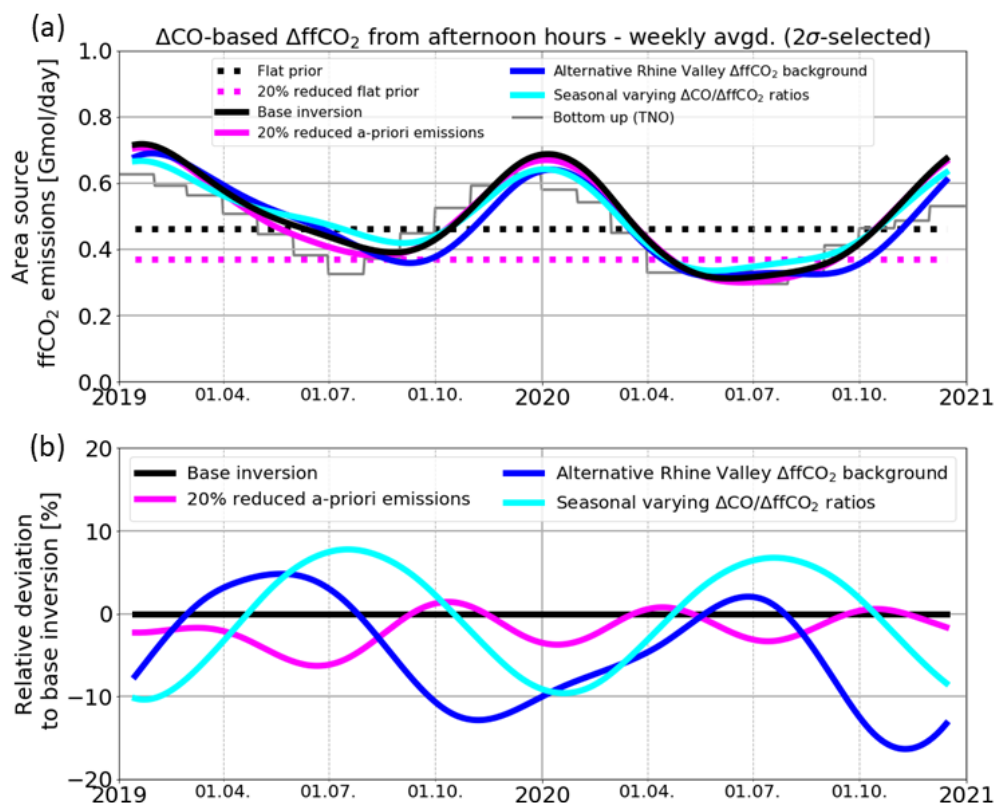

**Figure 5:** (a): Area source ffCO<sub>2</sub> emissions in the nearfield (blue surrounded area in Fig. 1b) of Heidelberg for different sensitivity runs. Shown are the a-posteriori results for 20% reduced flat a-priori emissions (solid magenta line), for an alternative Rhine Valley  $\Delta\text{ffCO}_2$  background modelled with EDGAR emissions (blue) and for an assumed seasonal cycle in the  $\Delta\text{CO}/\Delta\text{ffCO}_2$  ratios (cyan, see Fig. A2). As a reference, the a-posteriori result of the base inversion from Fig. 4a is shown in black. All a-posteriori results correspond to a 150% prior uncertainty. The dotted lines indicate the flat prior emissions (black) and the by 20% reduced prior emissions (magenta). (b): Relative deviations between the different a-posteriori area source emissions of the sensitivity runs and the base inversion in %.

365

370 In the following we want to investigate the robustness of the (weekly averaged)  $\Delta\text{CO}$ -based  $\Delta\text{ffCO}_2$  inversion results. For this, we (1) reduce the flat prior emissions by 20%, (2) assume a seasonal cycle in the  $\Delta\text{CO}/\Delta\text{ffCO}_2$  ratios, and (3) apply an alternative Rhine Valley  $\Delta\text{ffCO}_2$  background. Figure 5 shows the respective a-posteriori results for a 150% prior uncertainty, which constitutes enough weighting on the (weekly averaged)  $\Delta\text{CO}$ -based  $\Delta\text{ffCO}_2$  observations to reconstruct the seasonal cycle from the flat a-priori area source ffCO<sub>2</sub> emissions (see Fig. 4a).

375

First, if the a-priori area source ffCO<sub>2</sub> emissions in the Rhine Valley domain are equally reduced by 20% (see dotted magenta curve in Fig. 5a), the  $\Delta\text{CO}$ -based  $\Delta\text{ffCO}_2$  inversion manages to compensate for almost all of this bias (compare the magenta curves with the black curves in Fig. 5). The deviations between the a-posteriori emissions of the inversion runs with perturbed



and unperturbed flat prior emissions is typically below 5% for all seasons. Accordingly, the a-posteriori seasonal cycle of the  
380  $\text{ffCO}_2$  emissions is hardly affected by a potential bias in the flat prior emissions. The deviations between the annual totals of  
the a-posteriori estimates of the perturbed and unperturbed prior inversion runs is only 2% for both years. This means that on  
an annual scale about 90% of this 20%-bias in the perturbed flat prior could be corrected for.

With the second sensitivity test, we want to investigate the effect of the  $\Delta\text{CO}/\Delta\text{ffCO}_2$  ratios used to construct the  $\Delta\text{CO}$ -based  
385  $\Delta\text{ffCO}_2$  record. For our base inversion, the  $\Delta\text{CO}$ -based  $\Delta\text{ffCO}_2$  record was constructed by using the average  $\Delta\text{CO}/\Delta\text{ffCO}_2$  ratio  
of 8.44 ppb/ppm, which was calculated from all flask samples collected in 2019 and 2020. However, as discussed in Maier et  
al. (2023a), the ratio during summer with lower signals is hard to determine and thus less constrained. The question is thus:  
How would our inversion results change if the  $\Delta\text{CO}/\Delta\text{ffCO}_2$  ratios would have a (small) seasonal cycle? For this, we assume  
a seasonal cycle in the ratios for the two years with 5% lower ratios in summer and correspondingly 5% larger ratios in winter,  
390 so that the two-year mean is still 8.44 ppb/ppm (see Fig. A2). Notice, that we use the ratios to calculate the  $\Delta\text{ffCO}_{2,\text{MHD}}$  excess  
compared to the MHD background site and then subtract the modelled Rhine Valley  $\Delta\text{ffCO}_{2,\text{CE-RV}}$  background to get the  
 $\Delta\text{ffCO}_{2,\text{RV}}$  observations for our Rhine Valley inversion (see Eq. 1). This effectively results in summer and winter  $\Delta\text{ffCO}_2$   
concentrations being more than 5% larger and lower, respectively, than the  $\Delta\text{ffCO}_2$  concentrations based on the average ratio.  
Obviously, this leads to larger a-posteriori emissions (cyan curve in Fig. 5) during summer and lower emissions in winter  
395 compared to the base inversion results. The largest seasonal deviations to the base inversion a-posteriori emissions are 10%.  
Since by construction the mean of the seasonally varying ratios corresponds to the average ratio used for the base inversion,  
the effect on the annual totals of the a-posteriori  $\text{ffCO}_2$  emissions is neglectable.

Finally, we investigate the impact of the lateral  $\Delta\text{ffCO}_2$  boundaries on the area source  $\text{ffCO}_2$  emissions estimates. For our base  
400 inversion, we used the high-resolution TNO emission inventory and WRF-STILT to model for the Heidelberg observation site  
the  $\Delta\text{ffCO}_2$  contributions from the European STILT domain outside the Rhine Valley (see Sect. 2.2.4). For the following  
sensitivity run (blue curve in Fig. 5), we model the Rhine Valley  $\Delta\text{ffCO}_2$  background with  $\text{ffCO}_2$  emissions based on the  
Emissions Database for Global Atmospheric Research (EDGAR, Janssens-Maenhout et al., 2019) and use the coarser ECMWF  
meteorology in STILT. The application of this alternative Rhine Valley  $\Delta\text{ffCO}_2$  background leads to more than 10% lower  
405 emissions in the autumn of both years, which can be explained by strong deviations between the weekly averages of the two  
modelled background concentrations during these periods (see Fig. A3). Thus, the Rhine Valley background affects the  
seasonal cycle of the area source  $\text{ffCO}_2$  emissions. During summer, the deviations to the base inversion results are below 5%.  
The annual totals of the area source  $\text{ffCO}_2$  emissions around Heidelberg are 3% and 7% lower in the years 2019 and 2020,  
respectively, if the alternative Rhine Valley  $\Delta\text{ffCO}_2$  background is used.



## 410 4 Discussion

In the present study we investigate the potential of  $^{14}\text{C}$ -based and  $\Delta\text{CO}$ -based  $\Delta\text{ffCO}_2$  observations to evaluate the  $\text{ffCO}_2$  emissions and their seasonal cycle in an urban region around the Heidelberg observation site. This urban area is characterized by a complex topography and a large spatial heterogeneity in the  $\text{ffCO}_2$  sources, including several nearby point sources. Thus, defects in the transport model and inaccuracies in the driving meteorology strongly impact the model-data mismatch at the observation site, which will be minimized by the inversion algorithm. We focus on the estimation of the  $\text{ffCO}_2$  emissions from area sources, since the observations from the Heidelberg site with an air intake height of 30 m above the ground are not suitable to constrain the emissions of nearby point sources with elevated stack heights. Indeed, the analysis of the  $\Delta\text{CO}/\Delta\text{ffCO}_2$  ratios in Maier et al. (2023a) showed that the Heidelberg observation site is hardly influenced by pure point source emission plumes. Moreover, we expect that point source emissions can be better quantified a-priori from bottom up compared to area source emissions. Therefore, we prescribe the well-known point source  $\text{ffCO}_2$  emissions in the inversion setup and only adjust the area source emissions in the Rhine Valley domain.

### 4.1 Can flask-based $\Delta\text{ffCO}_2$ observations be used to predict the seasonal cycle of $\text{ffCO}_2$ emissions at an urban site?

To investigate the potential of  $\Delta\text{ffCO}_2$  observations to predict the seasonal cycle of the area source  $\text{ffCO}_2$  emissions around Heidelberg, we applied temporally constant (flat) a-priori  $\text{ffCO}_2$  emissions in our inversion system, such that all seasonal information comes from the atmospheric data. We could show that  $^{14}\text{C}$ -based  $\Delta\text{ffCO}_2$  observations from almost 100 hourly flask samples collected in the two years 2019 and 2020 are not sufficient to reconstruct a robust seasonal cycle from the flat a-priori estimate. As the Bayesian inversion setup assumes a Gaussian distribution for the model-data mismatch, the inversion algorithm tries to primarily reduce the largest model-data differences. Therefore, we applied a  $2\sigma$  selection to exclude the flask events with the largest model-data mismatches and thus worse model performances. However, the a-posteriori  $\text{ffCO}_2$  emissions are still very sensitive to individual flask observations. Therefore, a strong regularization through small a-priori uncertainties (i.e.  $< 50\%$  prior uncertainty, Fig. 3a) is needed to avoid large overfitting patterns in the inversion results.

By subsampling the  $\Delta\text{CO}$ -based  $\Delta\text{ffCO}_2$  record, we further investigate the potential of a uniform data coverage with one hypothetical afternoon flask per week to reliably estimate the seasonal cycle in the area source emissions. Indeed, several afternoon flask samples per week are needed, as well as an averaging of the flask observations within one week so that the overfitting of individual flask data is reduced. However, the situation should be better for real, e.g. sub-weekly,  $^{14}\text{C}$  flasks compared to the subsampled  $\Delta\text{CO}$ -based  $\Delta\text{ffCO}_2$  record; as the applied average  $\Delta\text{CO}/\Delta\text{ffCO}_2$  ratio may be inappropriate for individual hours, this could amplify the sensitivity to the individual hypothetical flasks. For the Heidelberg observation site where the flask sampling during our study period was rather irregularly, we used the  $\Delta\text{CO}/\Delta\text{ffCO}_2$  flask ratios to construct a continuous  $\Delta\text{CO}$ -based  $\Delta\text{ffCO}_2$  record (see Maier et al., 2023a) that, due to its high frequency could then be averaged in the inversion framework to explore the seasonal cycle of the  $\text{ffCO}_2$  emissions.





#### 4.2 What is an appropriate averaging interval for urban observations?

The main advantage of the  $\Delta\text{CO}$ -based  $\Delta\text{ffCO}_2$  record is its continuous data coverage that allows an averaging so that the influence of individual hours with poor model performance on the inversion results is strongly reduced. In this urban region, this is especially necessary because of the shortcomings in the STILT model and its driving meteorology to describe the transport and mixing of nearby point source emissions. Imagine that the plume of a point source arrives a few hours earlier or later at the observation site than simulated by STILT. In such cases, averaging is inevitable to prevent a wrong adjustment of the  $\text{ffCO}_2$  emissions. Moreover, the STILT-VSI approach itself has its deficits as it assumes mean effective emission height profiles for all meteorological situations and ignores the stack heights of individual power plants. Furthermore, the VSI approach still relies on a correct vertical mixing in STILT. Whereas in Maier et al. (2022) we could show that the VSI approach strongly improves the agreement between modelled and observed  $\Delta\text{ffCO}_2$  concentrations from two-week integrated samples, it thus still may overestimate the point source contributions for individual hours. Therefore, an averaging of the observations is very helpful when a transport model like STILT is used to describe the transport and mixing of nearby point source emissions.

In Appendix A1, we investigate how to appropriately average the observational data. Ideally, the a-posteriori area source  $\text{ffCO}_2$  emissions are independent of a wrong modelling of the point source emissions. Thus, they should not be affected by whether the a-priori point source emissions are fixed or adjustable in the inversion framework. We showed that an averaging interval of one week limits the differences between the a-posteriori area source  $\text{ffCO}_2$  emissions of the inversion runs with fixed and adjustable point source emissions, respectively, to below 30% for all seasons. This deviation can be used as a measure for the uncertainty of the a-posteriori area source  $\text{ffCO}_2$  emissions that is induced by an inadequate modelling of the point source emissions. A longer, e.g. monthly, averaging interval further reduces this difference, but comes along with an averaging over very different meteorological situations and thus reduces the spatiotemporal information comprised in the observations. This might be especially important if there are several observation sites, and the inversion system optimizes the  $\Delta\text{ffCO}_2$  gradients between these different stations. The averaging interval of a week corresponds to the typical length scale of synoptic weather patterns. Therefore, a certain correlation between the model-data-mismatch uncertainty within one week has anyhow to be considered in the inversion and the weekly averaging should, thus, not destroy too much information. In this study, we thus applied an averaging interval of one week as a compromise between reducing the impact of hours with an inadequate model performance and using as much observational information as possible.

#### 4.3 What is the potential of $\Delta\text{CO}$ -based $\Delta\text{ffCO}_2$ to estimate the seasonal cycle in urban $\text{ffCO}_2$ emissions?

The potential of weekly averaged  $\Delta\text{CO}$ -based  $\Delta\text{ffCO}_2$  observations to explore the seasonal cycle of the  $\text{ffCO}_2$  emissions in an urban region is very promising. In Heidelberg, we could reliably reconstruct the seasonal cycle from flat a-priori area source  $\text{ffCO}_2$  emissions with the  $\Delta\text{CO}$ -based  $\Delta\text{ffCO}_2$  observations for increased prior uncertainties. We further could detect the



475 COVID-19 signal in 2020, which is characterized by lower emissions compared to 2019 and a very steep decline in the  
emissions in spring 2020. In this latter year, the a-posteriori seasonal cycle agrees very well with the bottom-up seasonal cycle  
from TNO, where the timing of the COVID-19 restrictions has explicitly been considered. For 2019, TNO only provides a  
non-year-specific European average seasonal cycle, which has its annual minimum in July. In contrast, our  $\Delta\text{CO}$ -based  $\Delta\text{ffCO}_2$   
480 observations suggest the 2019 minimum of the (restricted) Rhine Valley area source  $\text{ffCO}_2$  emissions to be in August and  
September, when local summer holidays take place in that part of Germany. Even when we apply the bottom-up seasonal  
cycles from TNO to the flat a-priori  $\text{ffCO}_2$  emissions the inversion system still tries to shift the minimum in 2019 from July  
into September. However, due to the limited temporal degrees of freedom in our inversion system, this comes along with  
artificially increased or decreased emissions in May and October 2019, respectively. Thus, this result of the Heidelberg  
inversion points to some inconsistencies in the seasonality of TNO emissions in the footprint of the station. A correct phasing  
of the fossil emissions is essential when prescribed  $\text{ffCO}_2$  emissions and associated forward modelling results are used in  
485 atmospheric transport inversions to constrain the  $\text{CO}_2$  fluxes from the biosphere.

In contrast to the inversion with flask- $^{14}\text{C}$ -based  $\Delta\text{ffCO}_2$  observations, the  $\Delta\text{CO}$ -based  $\Delta\text{ffCO}_2$  inversion allows a weakening  
of the regularization strength without generating unrealistic variability in the seasonal cycle of the  $\text{ffCO}_2$  emissions. This  
implies that the a-posteriori results are less dependent on a potential bias in the a-priori emissions. Indeed, a sensitivity run  
490 with a 20% reduced flat prior estimate for the area source  $\text{ffCO}_2$  emissions leads for sufficiently large prior uncertainties to  
similar results as the base inversion run with unperturbed prior estimate. Thus, the  $\Delta\text{CO}$ -based  $\Delta\text{ffCO}_2$  inversion is able to  
simultaneously reconstruct the seasonal cycle from a flat prior and correct a potential bias in the a-priori emissions.

However, the  $\Delta\text{CO}$ -based  $\Delta\text{ffCO}_2$  inversion results strongly depend on a potential bias in the  $\Delta\text{CO}/\Delta\text{ffCO}_2$  ratios that are  
495 applied to calculate the  $\Delta\text{ffCO}_2$  estimates. Since there is no evidence for a strong seasonal cycle in the  $\Delta\text{CO}/\Delta\text{ffCO}_2$  ratios at  
the Heidelberg observation site, we used a constant average  $\Delta\text{CO}/\Delta\text{ffCO}_2$  ratio to calculate the  $\Delta\text{CO}$ -based  $\Delta\text{ffCO}_2$  record for  
the two years 2019 and 2020 (see Maier et al., 2023a). But due to the low signals and the weak correlation between  $\Delta\text{CO}$  and  
 $\Delta\text{ffCO}_2$  during summer, it is hard to determine separate summer ratios. Nevertheless, our results indicate that there might be a  
small seasonal cycle on the order of 5% in the ratio. In this study, we could show that a hypothetical seasonal cycle with 5%  
500 lower and 5% larger ratios in summer and winter, respectively, would lead to changes in the area source  $\text{ffCO}_2$  emissions of  
up to 10% for individual seasons. This emphasizes the importance of a thorough determination of the  $\Delta\text{CO}/\Delta\text{ffCO}_2$  ratios to  
prevent biases in estimates of total fluxes and the seasonal cycle of the  $\text{ffCO}_2$  emissions.

Indeed, we are currently in a kind of a fortunate situation in Heidelberg, since the emission ratios of the traffic and heating  
505 sectors seem to be quite similar in the main footprint of the station (see Maier et al., 2023a). Hence, despite the varying share  
of traffic and heating over the course of a year, this simply allowed the usage of a constant average flask-based  $\Delta\text{CO}/\Delta\text{ffCO}_2$



ratio for constructing the  $\Delta\text{CO}$ -based  $\Delta\text{ffCO}_2$  record. Of course, it is much more challenging to determine continuous  $\Delta\text{CO}$ -based  $\Delta\text{ffCO}_2$  estimates for stations where the  $\Delta\text{CO}/\Delta\text{ffCO}_2$  ratios show large seasonal or even diurnal variabilities.

510 A common challenge in regional inversions is the determination of the lateral boundary conditions (Munassar et al., 2023). In this study, we used two different emission inventories and meteorological fields to estimate the  $\Delta\text{ffCO}_2$  background for the Rhine Valley domain by modelling the contributions from the Central European  $\text{ffCO}_2$  emissions outside the Rhine Valley. For individual seasons the a-posteriori area source  $\text{ffCO}_2$  emissions around Heidelberg can differ by more than 10%. This highlights the strong need for appropriate boundary conditions. In Europe, the Integrated Carbon Observation System (ICOS,  
515 Heiskanen et al., 2022) provides high-quality atmospheric in-situ data from a network of tall-tower stations that cover a large part of the European continent. These observations may help to verify the  $\text{ffCO}_2$  emissions in Europe. Then, the optimized European  $\text{ffCO}_2$  emissions could be used to estimate more reliably the  $\Delta\text{ffCO}_2$  background for the Rhine Valley domain.

Overall, our results demonstrate that the weekly averaged  $\Delta\text{CO}$ -based  $\Delta\text{ffCO}_2$  observations are currently well suited to  
520 investigate the amplitude and the phasing of the seasonal cycle of the area source  $\text{ffCO}_2$  emissions in the main footprint of the Heidelberg observation site. The different sensitivity runs suggest that  $\Delta\text{CO}$ -based  $\Delta\text{ffCO}_2$  allows a reconstruction of this seasonal cycle from temporally constant a-priori estimates with an uncertainty of below ca. 30% for all seasons. Thus, **one**  
 recommend applying this  $\Delta\text{CO}$ -based  $\Delta\text{ffCO}_2$  inversion at further urban sites with a strong heterogeneity in the local  $\text{ffCO}_2$  sources if the  $\Delta\text{CO}/\Delta\text{ffCO}_2$  ratios can be determined accurately.

525 Finally, the  $\Delta\text{CO}$ -based  $\Delta\text{ffCO}_2$  inversion can be seen as a simplification of a multi-species inversion, which is based on collocated  $\text{CO}_2$  and  $\text{CO}$  observations. Such a multi-species inversion exploits the fact that the collocated  $\text{CO}_2$  and  $\text{CO}$  observations are affected by the same atmospheric transport and that these two species have partially overlapping emission patterns (Boschetti et al., 2018). Boschetti et al. (2018) show that the consideration of these inter-species correlations leads to  
530 a reduction in the respective a-posteriori uncertainties of the  $\text{ffCO}_2$  (and  $\text{CO}$ ) emissions. While our  $\Delta\text{CO}$ -based  $\Delta\text{ffCO}_2$  inversion assumes a constant but observation-based  $\Delta\text{CO}/\Delta\text{ffCO}_2$  ratio, the multi-species inversion intrinsically considers the spatiotemporal variability of the ratios. However, this requires reliable a-priori estimates of the  $\text{CO}/\text{ffCO}_2$  emission ratios and their uncertainties, as well as neglectable non-fossil  $\text{CO}$  sources and sinks.

## 5 Conclusions

535 This study illustrates the strong potential of continuous  $\Delta\text{CO}$ -based  $\Delta\text{ffCO}_2$  observations to determine the seasonal cycle of  $\text{ffCO}_2$  emissions in an urban region with highly heterogeneous  $\text{ffCO}_2$  sources in its vicinity. The ability of averaging and thus reducing the influence of individual hours with an inadequate model performance makes  $\Delta\text{CO}$ -based  $\Delta\text{ffCO}_2$ , despite its larger



540

uncertainty, currently a better tracer than discrete  $^{14}\text{C}$ -based  $\Delta\text{ffCO}_2$  from weekly flasks for estimating the seasonal cycle of the area source  $\text{ffCO}_2$  emissions in the Upper Rhine Valley around the urban Heidelberg observation site.

545

For our study, we set up the CarboScope inversion system in the Rhine Valley. It is based on the high-resolution WRF-STILT model and uses the STILT volume source influence (VSI) approach developed in Maier et al. (2022) to represent the emission heights of point sources. However, despite the high-resolution WRF meteorology and the improved STILT-VSI approach, almost 100  $^{14}\text{C}$ -based  $\Delta\text{ffCO}_2$  estimates from flasks collected in Heidelberg during the two years 2019 and 2020 are insufficient to robustly estimate month-to-month variations of the area source  $\text{ffCO}_2$  emissions in the main footprint of the site. Indeed, it seems that several flasks per week would be needed, so that the flask observations within one week could be averaged and overfitting of individual flask observations be prevented.

555

Due to the fortunate circumstance of currently having similar heating and traffic emission ratios in the main footprint of Heidelberg, we could use the average  $^{14}\text{C}$ -based  $\Delta\text{CO}/\Delta\text{ffCO}_2$  ratio from the flasks to construct a continuous  $\Delta\text{CO}$ -based  $\Delta\text{ffCO}_2$  record (see Maier et al., 2023a). The weekly averaging of this  $\Delta\text{CO}$ -based  $\Delta\text{ffCO}_2$  record strongly reduces the impact of hours with an inadequate modelling on the a-posteriori  $\text{ffCO}_2$  emissions. In fact, the weekly averaged  $\Delta\text{CO}$ -based  $\Delta\text{ffCO}_2$  observations can robustly reconstruct the amplitude and the phasing of the seasonal cycle of the  $\text{ffCO}_2$  area source emissions even from temporally constant a-priori emissions. In particular, the observational data clearly contain the distinct COVID-19 signal in 2020, which is characterized by overall lower emissions compared to 2019 and a steep drop in emissions in spring 2020 with the onset of the restrictions. Moreover, the comparison with the bottom-up emissions from TNO points to some inconsistencies in the TNO seasonality of the area source  $\text{ffCO}_2$  emissions in the footprint of Heidelberg in 2019.

560

Overall, our sensitivity runs suggest that we can reconstruct the seasonal cycle of the  $\text{ffCO}_2$  area source emissions around Heidelberg with an uncertainty of below ca. 30%. Therefore, one may recommend applying the  $\Delta\text{CO}$ -based  $\Delta\text{ffCO}_2$  inversion at further urban sites with heterogeneous  $\text{ffCO}_2$  sources, if the  $\Delta\text{CO}/\Delta\text{ffCO}_2$  ratios can be estimated accurately. If ratios from bottom-up inventories are not trusted or the urban region is influenced by CO emissions from the biosphere, the ratios are most reliably calculated from  $^{14}\text{C}$  flasks. Then, at least some of the summer  $^{14}\text{C}$  flasks should be collected during situations with significant CO and  $\text{ffCO}_2$  signals, so that a possible seasonal cycle in the  $\Delta\text{CO}/\Delta\text{ffCO}_2$  ratios could be identified. At remote sites, such as at several ICOS atmosphere stations, with low  $\text{ffCO}_2$  signals and predominant biosphere influence the calculation of  $\Delta\text{CO}/\Delta\text{ffCO}_2$  ratios and the construction of a bias-free  $\Delta\text{CO}$ -based  $\Delta\text{ffCO}_2$  record might be more challenging than at an urban site. However, the model performance is expected to be better at remote sites with a typically higher air intake above the ground and a much lower heterogeneity in the surrounding  $\text{ffCO}_2$  sources with minor influences from nearby point sources. Consequently, the outcome of our urban study cannot directly be transferred to remote sites; further studies are needed to investigate the potential of  $^{14}\text{C}$ -based versus  $\Delta\text{CO}$ -based  $\Delta\text{ffCO}_2$  to estimate  $\text{ffCO}_2$  emissions at such sites.

570

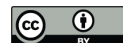

## Appendix

### A1. Impact of point sources on the a-posteriori area source ffCO<sub>2</sub> emissions

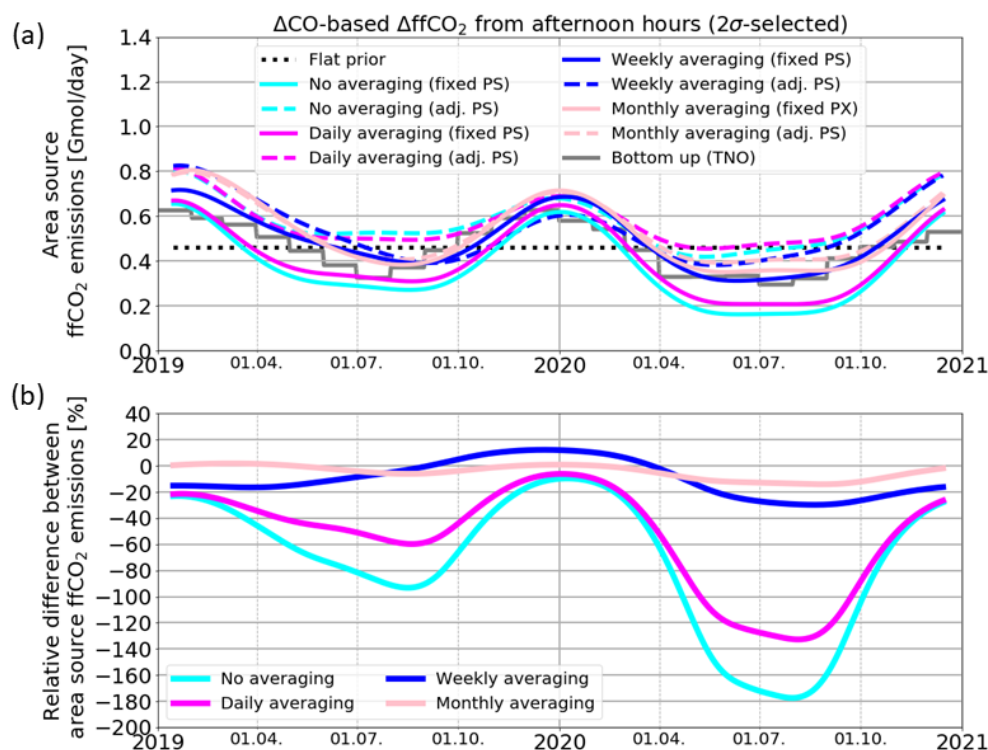

575 **Figure A1:** (a): Area source ffCO<sub>2</sub> emissions in the nearfield (blue surrounded area in Fig. 1b) of Heidelberg. Shown are the results  
 of the ΔCO-based ΔffCO<sub>2</sub> inversion with fixed point sources (solid lines, “fixed PS”) and adjustable point sources (dashed lines, “adj.  
 PS”) for different averaging intervals ranging from no averaging at all (cyan) to daily averaging of the five hours of each afternoon  
 (magenta) and weekly (blue) and monthly (pink) averaging. All a-posteriori results correspond to a 150% prior uncertainty. The  
 flat a-priori emissions and the bottom-up emissions are shown as a reference in black and grey, respectively. (b): Relative differences  
 (fixed PS minus adj. PS) between the a-posteriori area source ffCO<sub>2</sub> emissions of the inversion runs with adjustable and fixed point  
 580 source emissions in %.

To investigate the influence of inadequate point source modelling on the a-posteriori area source ffCO<sub>2</sub> emissions, we use two  
 different ΔCO-based ΔffCO<sub>2</sub> inversion setups: (1) an inversion with fixed point source emissions (“INV\_fix”) and (2) an  
 inversion with adjustable point source emissions (“INV\_adj”). The first inversion setup corresponds to the inversion described  
 in Sect. 2. It optimizes the flat a-priori area source emissions by using fixed monthly point source emissions. The second  
 585 inversion setup optimizes both, the flat a-priori area source emissions, and the monthly a-priori point source emissions.  
 Thereby, the point source emissions from the energy production and the industry sector, respectively, get the same temporal  
 (i.e. “Filt3T” in CarboScope notation, see Sect. 2.2.6) and spatial (i.e. one spatial scaling factor) degrees of freedom like the  
 area source emissions. Ideally, both inversion setups should lead to the same a-posteriori area source emissions, meaning that  
 the modelling of the well-known point source emissions has no influence on the area source emission estimates. Obviously,



590 this is not the case. If the model-data mismatches of the individual afternoon hours of the  $\Delta\text{CO}$ -based  $\Delta\text{ffCO}_2$  record are not averaged, the INV\_fix inversion leads to much lower area source emissions estimates than the INV\_adj inversion (see cyan curves in Fig. A1). For individual seasons, e.g. in summer 2020, the differences are larger than 150%. Thus, the INV\_fix inversion tends to decrease the area source emissions to compensate for an inadequate modelling of the (fixed) point source emissions. This shows that even with the VSI approach the model seems to overestimate the contributions from point sources at the Heidelberg observation site for individual hours.

The averaging over one afternoon (magenta curve in Fig. A1) leads only to minor improvements; there are still deviations larger than 100% in summer 2020. In contrast, the averaging interval of one week (blue curve) limits the largest deviations in summer 2020 to below 30%. Averaged over the two years 2019 and 2020, these deviations between the INV\_fix and INV\_adj a-posteriori area source emissions are even less than 10%. A monthly averaging interval (pink curve) further reduces the deviations to below 20% in summer 2020.

## A2. Hypothetical seasonal cycle in the $\Delta\text{CO}/\Delta\text{ffCO}_2$ ratios

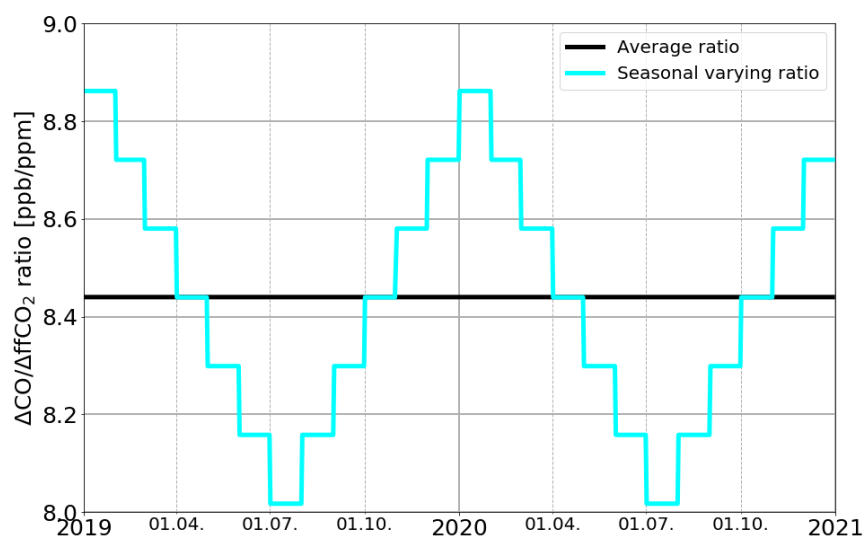

605 **Figure A2:** Average  $\Delta\text{CO}/\Delta\text{ffCO}_2$  ratio (black) and hypothetical seasonal varying ratio (cyan) used to construct the  $\Delta\text{CO}$ -based  $\Delta\text{ffCO}_2$  record for the base inversion (Fig. 4) and the sensitivity inversion run (cyan curve in Fig. 5), respectively.



### A3. Comparison between two modelled Rhine Valley $\Delta\text{ffCO}_2$ backgrounds

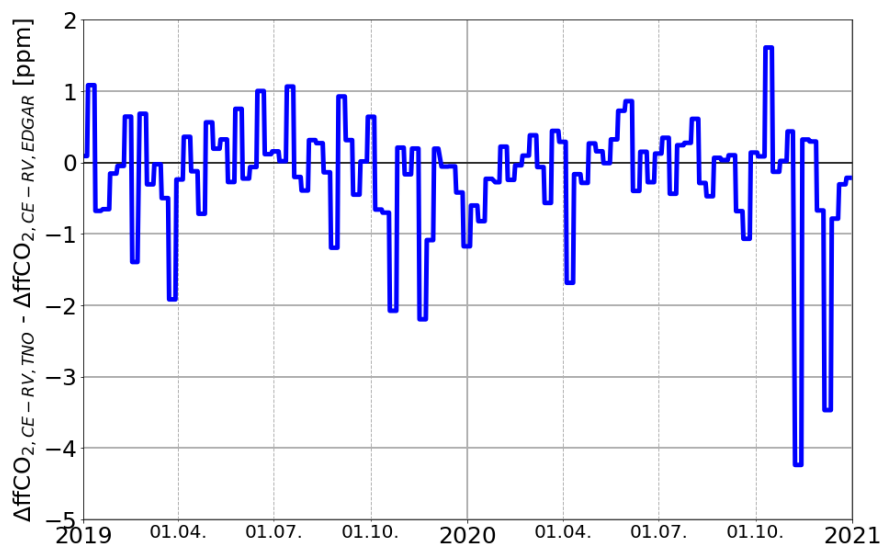

**Figure A3:** Difference between the Rhine Valley background modelled with TNO emissions ( $\Delta\text{ffCO}_{2,\text{CE-RV,TNO}}$ ) and the Rhine Valley background modelled with EDGAR emissions ( $\Delta\text{ffCO}_{2,\text{CE-RV,EDGAR}}$ ). Shown are weekly averages for afternoon situations.

610

615

620

625



### **Data availability**

We used the  $^{14}\text{C}$ - and  $\Delta\text{CO}$ -based  $\Delta\text{ffCO}_2$  data published with Maier et al. (2023a).

### 630 **Author contribution**

FM designed the study together with all co-authors. FM performed the inverse modelling and processed the inversion results. CR helped with applying the CarboScope inversion framework for the Rhine Valley domain. CG modelled the alternative Rhine Valley  $\Delta\text{ffCO}_2$  background with emissions based on EDGAR. The various inversion results were discussed by all authors. FM wrote the manuscript with help of all co-authors.

### 635 **Competing interests**

Some authors are members of the editorial board of ACP. The peer-review process was guided by an independent editor, and the authors have also no other competing interests to declare.

### **Acknowledgement**

We are grateful to the staff of TNO at the Department of Climate, Air and Sustainability **in Utrecht** for providing the emission  
640 inventory as well as to Julia Marshall and Michał Gałkowski for computing and processing the high-resolution WRF  
meteorology in the Rhine Valley.

### **Financial support**

This research has been supported by the German Weather Service (DWD), the ICOS Research Infrastructure and VERIFY  
(grant no. 776810, Horizon 2020 Framework). The ICOS Central Radiocarbon Laboratory is funded by the German Federal  
645 Ministry of Transport and Digital Infrastructure.

650





## References

- Andres, R. J., Boden, T. A., Bréon, F.-M., Ciais, P., Davis, S., Erickson, D., Gregg, J. S., Jacobson, A., Marland, G., Miller, J., Oda, T., Olivier, J. G. J., Raupach, M. R., Rayner, P., and Treanton, K.: A synthesis of carbon dioxide emissions from fossil-fuel combustion, *Biogeosciences*, 9, 1845–1871, <https://doi.org/10.5194/bg-9-1845-2012>, 2012.
- Basu, S., Lehman, S. J., Miller, J. B., Andrews, A. E., Sweeney, C., Gurney, K. R., Xue, X., Southon, J., and Tans, P. P.: Estimating US fossil fuel CO<sub>2</sub> emissions from measurements of <sup>14</sup>C in atmospheric CO<sub>2</sub>, *PNAS* 117(24): 13300–13307, <https://doi.org/10.1073/pnas.1919032117>, 2020.
- Bergamaschi, P., Danila, A., Weiss, R. F., Ciais, P., Thompson, R. L., Brunner, D., Levin, I., Meijer, Y., Chevallier, F., Janssens-Maenhout, G., Bovensmann, H., Crisp, D., Basu, S., Dlugokencky, E., Engelen, R., Gerbig, C., Günther, D., Hammer, S., Henne, S., Houweling, S., Karstens, U., Kort, E., Maione, M., Manning, A. J., Miller, J., Montzka, S., Pandey, S., Peters, W., Peylin, P., Pinty, B., Ramonet, M., Reimann, S., Röckmann, T., Schmidt, M., Strogies, M., Sussams, J., Tarasova, O., van Aardenne, J., Vermeulen, A. T., and Vogel, F.: Atmospheric monitoring and inverse modelling for verification of greenhouse gas inventories, EUR 29276 EN, Publications Office of the European Union, Luxembourg, ISBN 978-92-79-88938-7, JRC111789, <https://doi.org/doi:10.2760/759928>, 2018.
- Boschetti, F., Thouret, V., Maenhout, G. J., Totsche, K. U., Marshall, J., and Gerbig, C.: Multi-species inversion and IAGOS airborne data for a better constraint of continental-scale fluxes, *Atmos. Chem. Phys.*, 18, 9225–9241, <https://doi.org/10.5194/acp-18-9225-2018>, 2018.
- Ciais, P., D. Crisp, H. Denier Van Der Gon, R. Engelen, M. Heimann, G. Janssens-Maenhout, P. Rayner, and M. Scholze: Towards a European Operational Observing System to Monitor Fossil CO<sub>2</sub> Emissions. Final Report from the Expert Group, European Commission, October 2015, ISBN 978-92-79- 53482-9, doi:10.2788/350433, 2015. Available at [https://www.copernicus.eu/sites/default/files/2019-09/CO2\\_Blue\\_report\\_2015.pdf](https://www.copernicus.eu/sites/default/files/2019-09/CO2_Blue_report_2015.pdf), Last access: December 01, 2022.
- Dellaert, S., Super, I., Visschedijk, A., and Denier van der Gon, H.: High resolution scenarios of CO<sub>2</sub> and CO emissions, CHE deliverable D4.2, 2019. Available at <https://www.che-project.eu/sites/default/files/2019-05/CHE-D4-2-V1-0.pdf>, Last access: March 28, 2023.
- Denier van der Gon, H., Kuenen, J., Boleti, E., Maenhout, G., Crippa, M., Guizzardi, D., Marshall, J., and Haussaire, J.: Emissions and natural fluxes Dataset, CHE deliverable D2.3, 2019. Available at <https://www.che-project.eu/sites/default/files/2019-02/CHE-D2-3-V1-1.pdf>, Last access: March 28, 2023.



Duren, R., and Miller, C.: Measuring the carbon emissions of megacities, *Nature Clim Change* 2, 560–562, <https://doi.org/10.1038/nclimate1629>, 2012.

690 Friedlingstein, P., O'Sullivan, M., Jones, M. W., Andrew, R. M., Gregor, L., Hauck, J., Le Quéré, C., Lujikx, I. T., Olsen, A.,  
Peters, G. P., Peters, W., Pongratz, J., Schwingshackl, C., Sitch, S., Canadell, J. G., Ciais, P., Jackson, R. B., Alin, S. R.,  
Alkama, R., Arneeth, A., Arora, V. K., Bates, N. R., Becker, M., Bellouin, N., Bittig, H. C., Bopp, L., Chevallier, F., Chini, L.  
P., Cronin, M., Evans, W., Falk, S., Feely, R. A., Gasser, T., Gehlen, M., Gkritzalis, T., Gloege, L., Grassi, G., Gruber, N.,  
Gürses, Ö., Harris, I., Hefner, M., Houghton, R. A., Hurtt, G. C., Iida, Y., Ilyina, T., Jain, A. K., Jersild, A., Kadono, K., Kato,  
695 E., Kennedy, D., Klein Goldewijk, K., Knauer, J., Korsbakken, J. I., Landschützer, P., Lefèvre, N., Lindsay, K., Liu, J., Liu,  
Z., Marland, G., Mayot, N., McGrath, M. J., Metzl, N., Monacci, N. M., Munro, D. R., Nakaoka, S.-I., Niwa, Y., O'Brien, K.,  
Ono, T., Palmer, P. I., Pan, N., Pierrot, D., Pockock, K., Poulter, B., Resplandy, L., Robertson, E., Rödenbeck, C., Rodriguez,  
C., Rosan, T. M., Schwinger, J., Séférian, R., Shutler, J. D., Skjelvan, I., Steinhoff, T., Sun, Q., Sutton, A. J., Sweeney, C.,  
Takao, S., Tanhua, T., Tans, P. P., Tian, X., Tian, H., Tilbrook, B., Tsujino, H., Tubiello, F., van der Werf, G. R., Walker, A.  
700 P., Wanninkhof, R., Whitehead, C., Willstrand Wranne, A., Wright, R., Yuan, W., Yue, C., Yue, X., Zaehle, S., Zeng, J., and  
Zheng, B.: Global Carbon Budget 2022, *Earth Syst. Sci. Data*, 14, 4811–4900, <https://doi.org/10.5194/essd-14-4811-2022>,  
2022.

Gamnitzer, U., Karstens, U., Kromer, B., Neubert, R. E. M., Meijer, H. A. J., Schroeder, H., and Levin, I.: Carbon monoxide:  
705 A quantitative tracer for fossil fuel CO<sub>2</sub>?, *J. Geophys. Res.*, 111, D22302, <https://doi.org/10.1029/2005JD006966>, 2006.

Graven, H., Fischer, M. L., Lueker, T., Jeong, S., Guilderson, T. P., Keeling, R. F., Bambha, R., Brophy, K., Callahan, W.,  
Cui, X., Frankenberg, C., Gurney, K. R., LaFranchi, B. W., Lehman, S. J., Michelsen, H., Miller, J. B., Newman, S., Paplawsky,  
W., Parazoo, N. C., Sloop, C., and Walker, S. J.: Assessing fossil fuel CO<sub>2</sub> emissions in California using atmospheric  
710 observations and models, *Environ. Res. Lett.*, 13, 065007, <https://dx.doi.org/10.1088/1748-9326/aabd43>, 2018.

Heiskanen, J., Brümmer, C., Buchmann, N., Calfapietra, C., Chen, H., Gielen, B., Gkritzalis, T., Hammer, S., Hartman, S.,  
Herbst, M., Janssens, I. A., Jordan, A., Juurola, E., Karstens, U., Kasurinen, V., Kruijt, B., Lankreijer, H., Levin, I., Linderson,  
M., Loustau, D., Merbold, L., Myhre, C. L., Papale, D., Pavelka, M., Pilegaard, K., Ramonet, M., Rebmann, C., Rinne, J.,  
715 Rivier, L., Saltikoff, E., Sanders, R., Steinbacher, M., Steinhoff, T., Watson, A., Vermeulen, A. T., Vesala, T., Vítková, G.,  
and Kutsch, W.: The Integrated Carbon Observation System in Europe, *Bulletin of the American Meteorological Society*,  
103(3), E855–E872, <https://doi.org/10.1175/BAMS-D-19-0364.1>, 2022.



- 720 Hersbach, H., Bell, B., Berrisford, P., Hirahara, S., Horányi, A., Muñoz-Sabater, J., Nicolas, J., Peubey, C., Radu, R., Schepers, D., Simmons, A., Soci, C., Abdalla, S., Abellan, X., Balsamo, G., Bechtold, P., Biavati, G., Bidlot, J., Bonavita, M., De Chiara, G., Dahlgren, P., Dee, D., Diamantakis, M., Dragani, R., Flemming, J., Forbes, R., Fuentes, M., Geer, A., Haimberger, L., Healy, S., Hogan, R. J., Hólm, E., Janisková, M., Keeley, S., Laloyaux, P., Lopez, P., Lupu, C., Radnoti, G., de Rosnay, P., Rozum, I., Vamborg, F., Villaume, S., and Thépaut, J.-N.: The ERA5 global reanalysis, *Q J R Meteorol Soc.*, 146, 1999–2049, 725 <https://doi.org/10.1002/qj.3803>, 2020.
- Janssens-Maenhout, G., Crippa, M., Guizzardi, D., Muntean, M., Schaaf, E., Dentener, F., Bergamaschi, P., Pagliari, V., Olivier, J. G. J., Peters, J. A. H. W., van Aardenne, J. A., Monni, S., Doering, U., Petrescu, A. M. R., Solazzo, E., and Oreggioni, G. D.: EDGAR v4.3.2 Global Atlas of the three major greenhouse gas emissions for the period 1970–2012, *Earth Syst. Sci. Data*, 11, 959–1002, <https://doi.org/10.5194/essd-11-959-2019>, 2019. 730
- Jiang, F., Chen, J. M., Zhou, L., Ju, W., Zhang, H., Machida, T., Ciais, P., Peters, W., Wang, H., Chen, B., Liu, L., Zhang, C., Matsueda, H., and Sawa, Y.: A comprehensive estimate of recent carbon sinks in China using both top-down and bottom-up approaches, *Sci. Rep.* 6, 22130, <https://doi.org/10.1038/srep22130>, 2016. 735
- Kountouris, P., Gerbig, C., Rödenbeck, C., Karstens, U., Koch, T. F., and Heimann, M.: Technical Note: Atmospheric CO<sub>2</sub> inversions on the mesoscale using data-driven prior uncertainties: methodology and system evaluation, *Atmos. Chem. Phys.*, 18, 3027–3045, <https://doi.org/10.5194/acp-18-3027-2018>, 2018.
- 740 Lauvaux, T., Miles, N. L., Deng, A., Richardson, S. J., Cambaliza, M. O., Davis, K. J., Gaudet, B., Gurney, K. R., Huang, J., O’Keefe, D., Song, Y., Karion, A., Oda, T., Patarasuk, R., Razlivanov, I., Sarmiento, D., Shepson, P., Sweeney, C., Turnbull, J., and Wu, K.: High-resolution atmospheric inversion of urban CO<sub>2</sub> emissions during the dormant season of the Indianapolis Flux Experiment (INFLUX), *J. Geophys. Res. Atmos.*, 121, 5213–5236, doi:10.1002/2015JD024473., 2016
- 745 Levin, I., Kromer, B., Schmidt, M., and Sartorius, H.: A novel approach for independent budgeting of fossil fuel CO<sub>2</sub> over Europe by <sup>14</sup>CO<sub>2</sub> observations, *Geophys. Res. Lett.*, 30 (23), 2194, <https://doi.org/10.1029/2003GL018477>, 2003.
- Levin, I. and Karstens, U.: Inferring high-resolution fossil fuel CO<sub>2</sub> records at continental sites from combined <sup>14</sup>CO<sub>2</sub> and CO observations, *Tellus B*, 59, 245–250. <https://doi.org/10.1111/j.1600-0889.2006.00244.x>, 2007. 750
- Levin, I., Hammer, S., Eichelmann, E., and Vogel, F.: Verification of greenhouse gas emission reductions: The prospect of atmospheric monitoring in polluted areas, *Phil. Trans. R. Soc. A*, 369, 1906–1924, <https://doi.org/10.1098/rsta.2010.0249>, 2011.



755 Lin, J. C., Gerbig, C., Wofsy, S. C., Andrews, A. E., Daube, B. C., Davis, K. J., and Grainger, C. A.: A near-field tool for simulating the upstream influence of atmospheric observations: The Stochastic Time-Inverted Lagrangian Transport (STILT) model, *J. Geophys. Res.*, 108, 4493, <https://doi.org/10.1029/2002JD003161>, 2003.

760 Liu, J., Baskaran, L., Bowman, K., Schimel, D., Bloom, A. A., Parazoo, N. C., Oda, T., Carroll, D., Menemenlis, D., Joiner, J., Commane, R., Daube, B., Gatti, L. V., McKain, K., Miller, J., Stephens, B. B., Sweeney, C., and Wofsy, S.: Carbon Monitoring System Flux Net Biosphere Exchange 2020 (CMS-Flux NBE 2020), *Earth Syst. Sci. Data*, 13, 299–330, <https://doi.org/10.5194/essd-13-299-2021>, 2021.

765 Maier, F., Gerbig, C., Levin, I., Super, I., Marshall, J., and Hammer, S.: Effects of point source emission heights in WRF–STILT: a step towards exploiting nocturnal observations in models, *Geosci. Model Dev.*, 15, 5391–5406, <https://doi.org/10.5194/gmd-15-5391-2022>, 2022.

770 Maier, F., Levin, I., Conil, S., Gachkivskiy, M., and Hammer, S.: Uncertainty of continuous  $\Delta\text{CO}$ -based  $\Delta\text{ffCO}_2$  estimates derived from  $^{14}\text{C}$  flask and bottom-up  $\Delta\text{CO}/\Delta\text{ffCO}_2$  ratios, 2023a [submitted].

Maier, F., Levin, I., Gachkivskiy, M., Rödenbeck, C., and Hammer, S.: Estimating regional fossil-fuel  $\text{CO}_2$  concentrations from  $^{14}\text{CO}_2$  observations: Challenges and uncertainties, *Phil. Trans. R. Soc. A*, <https://doi.org/10.1098/rsta.2022.0203> [link not yet available], 2023b [approved for publication].

775 Monteil, G., Broquet, G., Scholze, M., Lang, M., Karstens, U., Gerbig, C., Koch, F.-T., Smith, N. E., Thompson, R. L., Luijkx, I. T., White, E., Meesters, A., Ciais, P., Ganesan, A. L., Manning, A., Mischurow, M., Peters, W., Peylin, P., Tarniewicz, J., Rigby, M., Rödenbeck, C., Vermeulen, A., and Walton, E. M.: The regional European atmospheric transport inversion comparison, EUROCOM: first results on European-wide terrestrial carbon fluxes for the period 2006–2015, *Atmos. Chem. Phys.*, 20, 12063–12091, <https://doi.org/10.5194/acp-20-12063-2020>, 2020.

780 Munassar, S., Rödenbeck, C., Koch, F.-T., Totsche, K. U., Gałkowski, M., Walther, S., and Gerbig, C.: Net ecosystem exchange (NEE) estimates 2006–2019 over Europe from a pre-operational ensemble-inversion system, *Atmos. Chem. Phys.*, 22, 7875–7892, <https://doi.org/10.5194/acp-22-7875-2022>, 2022.

785 Munassar, S., Monteil, G., Scholze, M., Karstens, U., Rödenbeck, C., Koch, F.-T., Totsche, K. U., and Gerbig, C.: Why do inverse models disagree? A case study with two European  $\text{CO}_2$  inversions, *Atmos. Chem. Phys.*, 23, 2813–2828, <https://doi.org/10.5194/acp-23-2813-2023>, 2023.



790 Nehr Korn, T., Eluszkiewicz, J., Wofsy, S. C., Lin, J. C., Gerbig, C., Longo, M., Freitas, S.: Coupled weather research and  
forecasting–stochastic time-inverted lagrangian transport (WRF–STILT) model. *Meteorol. Atmos. Phys.* 107, 51–64,  
<https://doi.org/10.1007/s00703-010-0068-x>, 2010.

Newsam, G. N. and Enting, I. G.: Inverse problems in atmospheric constituent studies: I. Determination of surface sources  
under a diffusive transport approximation, *Inverse Problems*, 4, 1037–1054, 1988.

795

Peylin, P., Law, R. M., Gurney, K. R., Chevallier, F., Jacobson, A. R., Maki, T., Niwa, Y., Patra, P. K., Peters, W., Rayner, P.  
J., Rödenbeck, C., van der Laan-Luijkx, I. T., and Zhang, X.: Global atmospheric carbon budget: results from an ensemble of  
atmospheric CO<sub>2</sub> inversions, *Biogeosciences*, 10, 6699–6720, <https://doi.org/10.5194/bg-10-6699-2013>, 2013.

800 Rödenbeck, C., Houweling, S., Gloor, M., and Heimann, M.: CO<sub>2</sub> flux history 1982–2001 inferred from atmospheric data  
using a global inversion of atmospheric transport, *Atmos. Chem. Phys.*, 3, 1919–1964, <https://doi.org/10.5194/acp-3-1919-2003>, 2003.

805 Rödenbeck, C.: Estimating CO<sub>2</sub> sources and sinks from atmospheric mixing ratio measurements using a global inversion of  
atmospheric transport, *Tech. Rep. 6*, Max Planck Institute for Biogeochemistry, Jena, Germany, 2005.

Rödenbeck, C., Gerbig, C., Trusilova, K., and Heimann, M.: A two-step scheme for high-resolution regional atmospheric trace  
gas inversions based on independent models, *Atmos. Chem. Phys.*, 9, 5331–5342, <https://doi.org/10.5194/acp-9-5331-2009>,  
2009.

810

Rödenbeck, C., Zaehle, S., Keeling, R., and Heimann, M.: How does the terrestrial carbon exchange respond to interannual  
climatic variations? A quantification based on atmospheric CO<sub>2</sub> data, *Biogeosciences*, 15, 1–18, <https://doi.org/10.5194/bg-15-1-2018>, 2018.

815 Suess, H.: Radiocarbon Concentration in Modern Wood, *Science*, 122, 415–417,  
<https://doi.org/10.1126/science.122.3166.415.b>, 1955.

Super, I., Dellaert, S. N. C., Visschedijk, A. J. H., and Denier van der Gon, H. A. C.: Uncertainty analysis of a European high-  
resolution emission inventory of CO<sub>2</sub> and CO to support inverse modelling and network design, *Atmos. Chem. Phys.*, 20,  
820 1795–1816, <https://doi.org/10.5194/acp-20-1795-2020>, 2020.



Turnbull, J. C., Miller, J. B., Lehman, S. J., Tans, P. P., Sparks, R. J., and Southon, J.: Comparison of  $^{14}\text{CO}_2$ , CO, and  $\text{SF}_6$  as tracers for recently added fossil fuel  $\text{CO}_2$  in the atmosphere and implications for biological  $\text{CO}_2$  exchange, *Geophys. Res. Lett.*, 33, L01817, <https://doi.org/10.1029/2005GL024213>, 2006.

825

Van Der Laan, S., Karstens, U., Neubert, R. E. M., Van Der Laan-Luijkx, I. T., and Meijer, H. A. J.: Observation-based estimates of fossil fuel-derived  $\text{CO}_2$  emissions in the Netherlands using  $\Delta^{14}\text{C}$ , CO and  $^{222}\text{Rn}$ , *Tellus B: Chemical and Physical Meteorology*, 62,5, 389-402, <https://doi.org/10.1111/j.1600-0889.2010.00493.x>, 2010.

830 Vogel, F., Hammer, S., Steinhof, A., Kromer, B., and Levin, I.: Implication of weekly and diurnal  $^{14}\text{C}$  calibration on hourly estimates of CO-based fossil fuel  $\text{CO}_2$  at a moderately polluted site in southwestern Germany, *Tellus B: Chemical and Physical Meteorology*, 62, 5, 512-520, <https://doi.org/10.1111/j.1600-0889.2010.00477.x>, 2010.

835 Wang, Y., Broquet, G., Ciais, P., Chevallier, F., Vogel, F., Wu, L., Yin, Y., Wang, R., and Tao, S.: Potential of European  $^{14}\text{CO}_2$  observation network to estimate the fossil fuel  $\text{CO}_2$  emissions via atmospheric inversions, *Atmos. Chem. Phys.*, 18, 4229–4250, <https://doi.org/10.5194/acp-18-4229-2018>, 2018.
